## Remodeling and compaction of the inactive X is regulated by *Xist* during female B cell activation

Isabel Sierra<sup>1</sup>, Son C. Nguyen<sup>2</sup>, R. Jordan Barnett<sup>3</sup>, Ashley L. Cook<sup>3</sup>, Han-Seul Ryu<sup>3</sup>, Zachary T. Beethem<sup>1</sup>, Jennifer E. Philips-Cremins<sup>2,3,4</sup>, Eric F. Joyce<sup>2,4</sup>, and Montserrat C. Anguera<sup>1, 4\*</sup>

<sup>1</sup>Department of Biomedical Science, School of Veterinary Medicine, University of Pennsylvania, Philadelphia, PA, 19104, USA

<sup>2</sup>Department of Genetics, Penn Epigenetics Institute, Perelman School of Medicine, University of Pennsylvania, Philadelphia, PA, 19104, USA

<sup>3</sup>Department of Bioengineering, University of Pennsylvania, Philadelphia, PA, 19104, USA

<sup>4</sup>Epigenetics Institute, Perelman School of Medicine, University of Pennsylvania, Philadelphia, PA, USA.

**Running Title: Higher-order folding of the inactive X during B cell stimulation**

**\*Correspondence:**

Montserrat C. Anguera  
[anguera@vet.upenn.edu](mailto:anguera@vet.upenn.edu)

**Keywords:** X-Chromosome Inactivation, Xist RNA, inactive X chromosome, XCI maintenance, XCI escape genes, chromosome structure, chromosome compartments, topological associated domains, allele-specific Hi-C, TAD remodeling, B cells, B cell stimulation

1 **ABSTRACT**

2

3 X Chromosome Inactivation (XCI) equalizes X-linked gene expression between sexes. B  
4 cells exhibit unusually dynamic XCI, as Xist RNA/heterochromatic marks on the inactive  
5 X (Xi) are absent in naïve B cells, but return following mitogenic stimulation. Xi gene  
6 expression analysis supports dosage compensation, but reveals high levels of XCI  
7 escape genes in both naive and activated B cells. Allele-specific OligoPaints indicate  
8 similar Xi and Xa territories in B cells that is less compact than in fibroblasts. Allele-  
9 specific Hi-C maps reveal a lack of TAD-like structures on the Xi of naïve B cells, and  
10 alterations in TADs and stronger TAD boundaries at Xi escape genes after mitogenic  
11 stimulation. Notably, *Xist* deletion in B cells reduces Xi compaction and changes TAD  
12 boundaries, independent of its localization to the Xi. Our findings provide the first evidence  
13 that Xi compaction/small scale organization in lymphocytes impact XCI maintenance and  
14 female biased X-linked gene expression.

## 15 INTRODUCTION

16  
17 X Chromosome Inactivation (XCI) equalizes X-linked gene expression between the sexes  
18 in female placental mammals. XCI occurs during early embryonic development through  
19 a multistep process initiated by the expression of the long non-coding RNA *Xist*<sup>1-4</sup>. The  
20 choice of X for silencing in XCI is random, but the future inactive X chromosome (Xi) can  
21 be identified by upregulation and spread of *Xist* RNA transcripts and heterochromatic  
22 factors that remove active histone modifications along its length. Various repressive  
23 epigenetic modifications are then added to the Xi, resulting in gene repression across  
24 most of the Xi<sup>5-11</sup>. The enrichment of *Xist* RNA and heterochromatic modifications across  
25 the Xi maintain a memory of transcriptional silencing with each cell division that is  
26 maintained into adulthood. While most of the Xi is transcriptionally silenced, some genes  
27 on the Xi 'escape' XCI in female somatic cells<sup>12,13</sup>. XCI escape genes usually lack *Xist*  
28 RNA and heterochromatic modifications<sup>14-18</sup>, supporting a critical role for *Xist* RNA and  
29 heterochromatic modifications to reinforce transcriptional silencing. Indeed, *Xist* deletion  
30 in a variety of somatic cells results in partial reactivation of the Xi, with cell-type specific  
31 abnormal overexpression of X-linked genes<sup>19-22</sup>. While recent studies have identified XCI  
32 escape genes across various mouse and human tissues<sup>23,24</sup>, escape genes responsible  
33 for sex biased function, particularly in immune cells<sup>25,26</sup>, that could contribute to female-  
34 biased autoimmune diseases, are not well defined.

35  
36 While the active X (Xa) retains typical features of mammalian chromosomes, including A  
37 (open/active chromatin) and B (closed/repressed chromatin) compartments, Hi-C

38 generated allele-specific spatial proximity profiles from mammalian fibroblasts and neural  
39 progenitor cells (NPCs) suggested that the Xi lacks compartments and TADs<sup>27,28</sup>.  
40 However, the presence of TADs on the Xi remains unresolved, as higher resolution Hi-C  
41 sequencing revealed faint, low-resolution TADs<sup>29,30</sup>. In contrast to the Xa, the Xi is highly  
42 compacted and spherical<sup>31</sup> and has a unique bipartite organization involving two ‘mega-  
43 domains’ separated by the microsatellite repeat *Dxz4* locus<sup>27,28,32</sup>. The unique three-  
44 dimensional structure of the Xi is thought to be dependent on Xist RNA, as *Xist* deletion  
45 in fibroblasts and NPCs results in loss of the mega-domain partition and appearance of  
46 well-defined TADs across the Xi<sup>27</sup>. While it appears that Xist RNA is required for  
47 maintenance of the three-dimensional structure of the Xi, the mechanistic basis for this  
48 effect remains unclear.

49  
50 Most somatic cells have persistent enrichment of Xist RNA and heterochromatic  
51 modifications at the Xi that are cytologically visible using RNA fluorescent in situ  
52 hybridization (FISH) and immunofluorescence (IF) techniques<sup>33,34</sup>. However, female  
53 lymphocytes exhibit an unusual dynamic form of XCI maintenance, as canonical robust  
54 Xist/XIST RNA ‘clouds’ are absent at the Xi of naive B cells from both mouse and  
55 human<sup>35-37</sup>, but Xist RNA re-localizes to the Xi following *in vitro* B cell stimulation with  
56 either CpG oligodeoxynucleotides (CpG) or lipopolysaccharide<sup>36,38</sup>. Moreover,  
57 heterochromatic histone modifications H3K27me3 and H2AK119Ub missing from the Xi  
58 in naive B cells appear concurrently with Xist RNA following *in vitro* B cell stimulation<sup>36,38</sup>.  
59 As *Xist/XIST* is constitutively expressed in naïve B cells, an inability to localize Xist RNA  
60 to the Xi in naïve B cells that can be overcome by B cell activation may provide a



61 mechanistic explanation for the dynamic XCI maintenance observed in  
62 lymphocytes<sup>36,38,39</sup>.

63

64 Naive B cells are quiescent, with significantly reduced transcription rates and highly  
65 condensed chromatin<sup>40</sup>. However, whether transcriptional repression is preserved across  
66 the Xi in naive B cells lacking enrichment of Xist RNA and heterochromatic histone  
67 modifications is unknown, and the frequency of XCI escape genes has not yet been  
68 evaluated. Moreover, while *in vitro* B stimulation causes significant genome-wide  
69 chromatin decondensation and rearrangement within the nucleus, with increased short-  
70 range DNA contacts and looping, all before the first cell division<sup>41,42</sup>, how the  
71 accumulation of Xist RNA impacts DNA contacts at silenced and XCI escape genes  
72 across the Xi in activated B cells is unknown.

73

74 Here we examine the transcriptional activity of the Xi in naive and *in vitro* activated female  
75 mouse B cells, to determine how activation impacts gene expression and the nuclear  
76 structure of the Xi. We find the Xi is dosage compensated despite the absence of Xist  
77 RNA accumulation across the Xi in naive B cells, and that 17-24% of expressed X-linked  
78 genes escape XCI in both naive and stimulated B cells. Using allele-specific OligoPaints  
79 and Hi-C analyses, we see that the global territory and compartmentalization of the Xi is  
80 relatively unchanged with B cell stimulation, yet we observe both dynamic changes in  
81 gene expression and Xi structure at the TAD level. Importantly, we show that likely both  
82 *Xist* transcription and Xist RNA transcripts are necessary for limiting stimulation induced  
83 changes to compaction of the Xi territory and Xi TAD organization in B cells. Together,

84 these findings provide the first evidence that Xi compaction/small scale organization in  
85 lymphocytes may influence XCI maintenance and female biased X-linked gene  
86 expression, providing a potential mechanistic explanation for the sex bias observed in  
87 many autoimmune diseases where B cells are pathogenic.

## 88 RESULTS

89

90 *The Xi is dosage compensated in the absence of Xist RNA localization in naive B cells*

91

92 To determine if Xi dosage compensation is impacted by the lack of Xist RNA ‘clouds’ at  
93 the Xi, we compared transcription from the Xa and Xi in naïve and *in vitro* stimulated  
94 female B cells in which Xist RNA ‘clouds’ are restored at the Xi. For these studies, we  
95 used a mouse model of skewed XCI, in which a female *Mus musculus* mouse harboring  
96 a heterozygous *Xist* deletion is mated to a wild-type *Mus castaneus* male, generating F1  
97 mice in which the paternal X chromosome is uniformly inactivated and single nucleotide  
98 polymorphisms (SNPs) can be used to distinguish each allele (**Figure 1A - left**). Using  
99 these F1 mice, we prepared RNA from splenic CD23+ naive B cells and B cells stimulated  
100 *in vitro* with CpG for 24hr for allele-specific RNA sequencing (**Figure 1A – right**). Principle  
101 component analysis of naive and *in vitro* stimulated B cells revealed separation between  
102 naive and stimulated samples, with tight clustering of replicates within each state  
103 (**Supplementary Figure S1A**). Surprisingly, we observed that the Xi is largely dosage  
104 compensated in both naive and *in vitro* stimulated B cells, as exhibited by the significantly  
105 higher mapped reads (reads per million mapped (RPM)) from the Xa compared to the Xi  
106 (**Figure 1B**). Xi gene expression arose from various regions across the Xi in both naive  
107 and *in vitro* stimulated B cells, with higher expression of genes located at the distal ends  
108 of the chromosome compared to the center (**Figure 1C**). Expressed regions were similar  
109 between the Xa and Xi, with higher expression for the Xa, in both naive and *in vitro*  
110 stimulated B cells (**Supplementary Figure S1B**).

111  
112  
113 *XCI escape genes are present in naive and stimulated B cells*  
114  
115 Using the allele-specific RNAseq datasets, we applied a previously published binomial  
116 distribution approach to identify XCI escape genes in female mouse B cells (see  
117 methods)<sup>23</sup>. Genes were considered expressed if their diploid Reads Per Kilobase Million  
118 (RPKM) was greater than 1 and their haploid expression (SRPM) was greater than 2. A  
119 95% confidence interval was applied and an expressed gene was considered to have  
120 ‘escaped’ if the probability of escape was greater than 0. We found a total of 249 X-linked  
121 genes expressed in both naive and stimulated B cells, of which 104 genes (roughly 41%)  
122 could be considered XCI escape genes across both naive and stimulated B cells  
123 **(Supplementary Table 1)**. XCI escape genes were largely shared between naive and  
124 stimulated B cells (60 genes) and exhibited diverse expression patterns in both states  
125 **(Supplementary Table 1, Supplementary Figure S1C)**. We identified 11 XCI escape  
126 genes unique to naive B cells, and 33 genes unique to stimulated B cells **(Figure 1D)**.  
127 Unique XCI escape genes spanned the X, residing near clusters of other escape genes  
128 (colored arrowheads in **Figure 1E**). Using gene ontology analyses, we found that B cell  
129 specific XCI escape genes function in XCI regulatory pathways, RNA processing,  
130 nucleotide metabolism, ribonucleoprotein complex biogenesis, negative regulation of  
131 cellular component organization, regulation of cytoplasmic transport, and regulation of  
132 type I interferon production **(Supplementary Figure S1D)**. Some novel XCI escape  
133 genes were specific for mouse B cells: *Dkc1*, *Zfp280c*, *Stk26*, **(Figure 1E, underlined)**.

134 There were 20 immunity-related XCI escape genes across naive and stimulated B cells,  
135 including *Was*, *Il2rg*, *Irak1*, *Cfp*, *Bcor*, and *Ikbkg* (**Figure 1E; genes in orange**). XCI  
136 escape genes also appear to function in transcription, chromatin modification, and  
137 regulation of chromosome architecture, including *Kdm5c*, *Smc1a*, *Jpx*, *Pol1a*, *Msl3*, *Phf8*,  
138 and *Atrx* (**Figure 1E, genes in green**). Intriguingly, a number of genes that regulate  
139 nuclear organization and chromatin architecture exclusively escape XCI in stimulated B  
140 cells (*Jpx*, *Smc1a*, *Ercc6l*, *Brcc3*, *Dkc1*, *Msl3* and *Pola1*), suggesting a novel role for  
141 increased dosage of X-linked genes in genome-wide nuclear organization changes in  
142 female B cells following stimulation.

143

144

145 *Xist* RNA transcripts are detected uniformly across the Xi at 12 hrs post-stimulation, and  
146 are enriched at the *Xist* locus at 24 hrs in stimulated B cells.

147

148 To directly assess *Xist* RNA enrichment across the Xi, we performed Capture  
149 Hybridization of RNA Targets (CHART) in primary female naïve and *in vitro* stimulated B  
150 cells at 12 and 24 hours after CpG treatment. As expected, *Xist* RNA was not detectable  
151 across the Xi in naive B cells (**Figure 2B, 0 hr**), with levels identical to those for  
152 chromosomes 4 and 13, which lack *Xist* localization (**Supplementary Figure S2**).  
153 However, at 12 hours post-stimulation, *Xist* RNA transcripts were detected across the Xi,  
154 and enrichment increased uniformly at all these regions by 24 hours (**Figure 2B**). We  
155 quantified the *Xist* RNA enrichment levels at 12 and 24 hours post-stimulation at three  
156 regions: the *Xist* RNA locus itself, the region +/- 2Mb surrounding *Xist* (excluding the *Xist*

157 promoter), and across the Xi. Xist RNA transcript accumulated at the *Xist* gene at 12 and  
158 24 hours, with lower yet evenly distributed Xist RNA reads +/- 2Mb surrounding the Xist  
159 gene (**Figure 2B, inset**). Relatively similar levels of Xist RNA were observed across the  
160 Xi and around the *Xist* gene at 12 hrs (**Figure 2C**), suggesting that Xist RNA is uniformly  
161 tethered across the Xi, in contrast to what is observed during XCI initiation<sup>43</sup>. By 24 hours  
162 significantly more Xist RNA transcripts were present at the *Xist* locus compared to +/-2Mb  
163 and the entire Xi (**Figure 2C**), and predominately accumulated at distal intergenic regions  
164 (46.80%) and intronic regions (13% at first intron, 28.52% at other introns) (**Figure 2D**),  
165 similar to what is observed in differentiated embryonic stem cells and mouse embryonic  
166 fibroblasts<sup>15</sup>. We also found eight regions across the Xi that were significantly depleted  
167 for Xist RNA transcripts (**Figure 2A, blue vertical bars**) at both 12 and 24 hours post-  
168 stimulation (**Figure 2E**). These regions included 92 X-linked genes (**Supplementary**  
169 **Table 2**), about a third (31 genes) of which were XCI escape genes (**Supplementary**  
170 **Table 2– green highlights**). The remaining 71 genes were transcriptionally repressed,  
171 but lacked Xist RNA enrichment, suggesting Xist RNA independent mechanisms for gene  
172 silencing at these loci.

173  
174 *The Xi in B cells retains canonical architectural features but is more similar to the Xa than*  
175 *the Xi in fibroblasts*

176  
177 Because female B cells exhibit dynamic XCI maintenance, we next asked whether the  
178 organization of the Xi territory in naive B cells that lack Xist RNA ‘clouds’ differs from the  
179 Xi of fibroblasts and if B cell activation induced changes in Xi mega-domains or

180 compaction. Using our F1 mouse model of skewed XCI (**Figure 1A**), we performed allele-  
181 specific genome-wide chromosome conformation capture (Hi-C) analyses (see methods).  
182 Visual inspection of contact heatmaps at 200kb resolution indicated that while the Xa in  
183 naive and stimulated B cells exhibits the typical checkerboard pattern indicative of A/B  
184 compartments observed in autosomal chromosomes, (**Figure 3A, Supplementary**  
185 **Figure S3A**), the Xi in naive and stimulated B cells showed minimal attenuated  
186 compartmentalization as was previously reported for the Xi in neural progenitor cells<sup>27</sup>.  
187 Consistent with previous reports<sup>27,32</sup>, we observed partitioning of the Xi into the two mega-  
188 domains around the *Dxz4* macrosatellite in both naive and stimulated B cells (**Figure 3A**  
189 **– green arrow, Figure 3B**). However, the *Dxz4* region in stimulated B cells had a visually  
190 stronger boundary insulation for the mega-domain location compared to naive B cells  
191 (**Figure 3B**), suggesting that cellular activation impacts boundary strength at regions  
192 across the Xi. Thus, A/B compartments exhibited significantly more fine-grained  
193 compartmentalization on the Xa than the Xi in B cells, and B cell activation did not  
194 significantly alter global compartment structure across the Xi (**Figure 3A**).

195  
196 As the Xi is more compact and spherical than the Xa in human diploid fibroblasts<sup>44</sup>, we  
197 next assessed compaction of the Xi and Xa territories in B cells using an orthogonal  
198 OligoPaints imaging method and 3D image analysis software Tools for Analysis of  
199 Nuclear Genome Organization (TANGO) to assess allele-specific chromosome territory  
200 surface area and sphericity<sup>45-47</sup> in individual nuclei. We designed a library of Homologue-  
201 specific OligoPaints for X chromosomes (HOPs-X) for DNA FISH analyses<sup>47</sup>, in which  
202 probes contained X-linked SNPs present in either *Mus musculus* (C57Bl/6, Mus) or *Mus*

203 *castaneus* (Cast) sequences (**Figure 3C – top**). Our HOPs-X probe library specifically  
204 labeled each X chromosome in primary splenic CD23+ naive and *in vitro* stimulated B  
205 cells and control primary fibroblasts isolated from F1 Mus x Cast mice (**Figure 3C**).  
206 Although minimal off-target binding of our probes was observed, we designed a post-  
207 TANGO image analysis processing pipeline in Python that utilized the integrated density  
208 of the X chromosomes within each fluorophore to more rigorously assign the alleles as  
209 the Xa or Xi. Quantification of the surface area of the Xa and Xi chromosome territories  
210 in naive and *in vitro* stimulated B cells (24hrs) revealed an Xa/Xi ratio for surface area  
211 close to 1 for both naive (1.13 median) and stimulated (1.10 median) B cells, indicating  
212 that the surface areas of Xa and Xi were not significantly changed by B cell activation  
213 (**Figure 3D**). Normalization revealed that the surface areas of the Xi was significantly  
214 smaller than the Xa in both naive and stimulated B cells and was not affected by B cell  
215 stimulation, with the Xa median changing from 0.20 to 0.19, and the Xi median changing  
216 from 0.18 to 0.17 (**Figure 3E**). As expected, the surface area ratio (Xa/Xi) for fibroblasts  
217 was greater than 1 (1.34 median) (**Figure 3D**) and the normalized surface area of the Xi  
218 in fibroblasts was significantly lower than the Xa (median Xa = 0.19, median Xi = 0.13),  
219 but also less than the Xi surface area of B cells (**Figure 3E, Supplementary Figure S3B,**  
220 **S3C**).

221  
222 As increased sphericity correlates with chromosome compaction<sup>47</sup>, we also  
223 measured the sphericity of the Xa and Xi chromosome territories in naive and stimulated  
224 B cells using HOPs-X probes. We found that the sphericity Xa/Xi ratios for naive and  
225 stimulated B cells were similar to each other (median naive = 0.66, median stimulated =



226 0.69), and significantly higher than the ratio in fibroblasts (median = 0.52) (**Figure 3F**,  
227 **Supplementary Figure S3D, S3E**). Sphericity measurements revealed that the Xi  
228 territory was consistently and significantly more spherical than the Xa territory in both B  
229 cells and fibroblasts (**Figure 3I**). B cell activation caused a slight but insignificant increase  
230 in Xi sphericity (median Xi naive = 0.12, median Xi stimulated = 0.14) but no change to  
231 the Xa (median Xa naive = 0.097, median Xa stimulated = 0.098) (**Figure 3G**,  
232 **Supplementary Figure S3D, S3E**). Together, HOPs-X measurements of the Xi and Xa  
233 territories demonstrate that the Xi is more compact and spherical than the Xa in naive  
234 and stimulated B cells and that the organization of the Xi territory in B cells is distinct from  
235 the Xi in fibroblasts.

236

237 *The Xi in naive B cells lacks TAD-like structures and B cell stimulation alters TADs and*  
238 *TAD boundary strength across the Xi*

239

240 In NPCs and fibroblasts, the Xi lacks TADs except at regions containing XCI escape  
241 genes<sup>27,48</sup>. Because we identified about 100 escape genes on the Xi (**Figure 1**) and B  
242 cell activation visually increased insulation of the mega-domain boundary (**Figure 3B**),  
243 we asked whether the Xi exhibited TAD-like structures in B cells and whether these  
244 structures changed with B cell activation. Using our allele-specific Hi-C heatmaps binned  
245 at 30kb resolution (see methods), there was minimal folding patterns indicative of TADs  
246 across the Xi in naive B cells, even at regions of gene escape (**Figure 4A - B**). At the *Xist*  
247 region, which has the highest transcriptional level across the Xi, we observed minimal  
248 TAD-like structures in naive B cells (*Xist*; **Figure 4C**). As expected, TADs were observed

249 across the Xa, indicating the lack of TADs on the Xi is not a general feature of  
250 chromosomes in naive B cells (**Supplementary Figure S4A - C**). We found that the Xi  
251 in stimulated B cells had visually increased TAD contacts at multiple XCI escape gene  
252 regions across the chromosome (**Figure 4A, B, green arrowheads**). To quantify  
253 stimulation-induced changes to TADs, we assessed the change in insulation score at XCI  
254 escape gene regions as well as at repressed genes on the Xi. In agreement with the  
255 visual changes in the heatmaps, we saw a significant decrease in the insulation score,  
256 indicative of increased boundary strength at XCI escape genes (**Figure 4D**). In contrast,  
257 for transcriptionally silent genes, boundary strength (in aggregate) did not change (**Figure**  
258 **D**). However, there were some regions across the Xi which lacked XCI escape genes that  
259 exhibited increased TAD boundary strength (**Supplementary Figure S4D**), indicating  
260 that the gain of TADs on the Xi did not always correlate with gene expression. Thus, while  
261 the Xi in naive B cells lacks resolvable TAD structures, B cell activation induces stronger  
262 TAD boundaries on the Xi at XCI escape genes.

263

264 To determine if the appearance of defined TAD boundaries induced by B cell activation  
265 coincided with the appearance of Xist RNA 'clouds' on the Xi, we used an OligoPaints  
266 DNA FISH assay to measure the spatial overlap of adjacent TAD regions, which serves  
267 as a proxy for cohesin-mediated DNA extrusion activity<sup>49</sup>. We designed oligos at specific  
268 Xi regions (*Nsdhl*, *Xiap*) at XCI escape genes that contained or lacked TAD structures in  
269 stimulated B cells. For each nucleus, we calculated both the center to center distance  
270 and the percent overlap for each signal. Loci which are closer in distance and have  
271 increased spatial overlap reflect increased extrusion activity, indicating that TAD

272 remodeling has occurred at this region. We paired our TAD probes and HOPS-X allele-  
273 specific probes (specific to either Xa or Xi) to identify TADs on the Xi in naïve and  
274 stimulated B cells. Hi-C heatmaps for the *Nsdhl* region (ChrX:69166360-71161360)  
275 indicated that naive B cells lacked TAD-like structures on the Xi, but that TADs were  
276 present in stimulated (24 hours post-activation) B cells (**Figure 4E**). While there was a  
277 non-significant decrease in center to center distances for the TAD probes during B cell  
278 stimulation, there was a significant increase in the signal overlap at 24 hours post-  
279 stimulation (**Figure 4E, 4F**), mirroring what we saw in the Hi-C contact matrix. While the  
280 center to center differences were not significant, a trend towards decreasing probe  
281 distances at 12 hours post-stimulation is when Xist RNA transcripts begin to accumulate  
282 across the Xi (**Figure 2**), suggesting that Xist RNA re-localizes to the Xi concurrently with  
283 TAD boundary changes. For the *Xiap* region, the Hi-C heatmaps (**Figure 4G**) and TAD  
284 FISH analysis (**Figure 4H**) indicated a lack of TAD-like structures in both naive and *in*  
285 *vitro* stimulated B cells, as predicted. Taken together, B cell stimulation induces TAD  
286 remodeling across the Xi, coinciding with peak levels of Xist RNA transcript accumulation  
287 across the Xi.

288  
289 *Xist* deletion increases B cell nuclear size and impacts Xi compaction in both naive and  
290 stimulated B cells

291  
292 To determine whether Xist RNA had a functional role in maintaining Xi compaction during  
293 the global de-compaction of chromosomes accompanying B cell activation <sup>41</sup>, we deleted  
294 *Xist* in mature B cells by mating *Xist* 2lox mice<sup>50</sup> to Mb1-Cre recombinase animals (with

295 expression starting at the proB cell stage<sup>51</sup>). Splenic CD23+ follicular wildtype and *Xist*<sup>cko</sup>  
296 B cells were activated *in vitro* using CpG and harvested at 24 hours, prior to the first cell  
297 division (**Figure 5A - top**). As expected, we observed stimulation-induced increases in  
298 total nuclear volume and nuclear surface area for wildtype cells (**Figure 5A – bottom**).  
299 Surprisingly, we found that *Xist*<sup>cko</sup> naive B cells exhibited significantly larger total nuclear  
300 volume and nuclear surface area compared to wildtype naive and stimulated B cells, and  
301 that stimulation further increased both the nuclear volume and surface area in *Xist*<sup>cko</sup>  
302 cells (**Figure 5A - bottom**).

303  
304 Based on these changes, we next asked whether *Xist* deletion would affect the  
305 compaction of the X chromosomes in either naive or stimulated B cells. Because the X  
306 chromosomes in our *Xist*<sup>cko</sup> B cells cannot be distinguished using SNPs, we used DNA  
307 FISH with X-chromosome OligoPaints (**Figure 5B – left**) for single-cell detection of  
308 compaction differences that may not be detected in bulk populations. To quantify changes  
309 to Xi compaction, we calculated the absolute difference in surface area and sphericity  
310 measurements between the two X chromosomes in individual cells. A larger difference in  
311 surface area was observed between X alleles for *Xist*<sup>cko</sup> naive and stimulated B cells  
312 compared to wildtype samples (**Figure 5B – middle**), suggesting that the Xi is less  
313 compact in *Xist*<sup>cko</sup> B cells. B cell stimulation did not change the absolute difference of X  
314 chromosome surface areas for either *Xist*<sup>cko</sup> or wildtype cells (**Figure 5B – middle**),  
315 supporting a regulatory role for *Xist* in managing Xi compaction in naive cells. Similarly,  
316 the difference in sphericity of the two X alleles was decreased in naive *Xist*<sup>cko</sup> B cells  
317 compared to wildtype naive and stimulated B cells, and B cell activation in *Xist*<sup>cko</sup> cells

318 did not further change X chromosome sphericity measurements (**Figure 5B – right**),  
319 suggesting that *Xist* deletion causes the Xi to become less spherical and less compact,  
320 and more similar to the Xa. Thus, *Xist* deletion may increase the total nuclear volume and  
321 nuclear surface area in B cells, potentially by decreasing Xi compaction and sphericity in  
322 naive B cells.

323

324 *Xist* deletion increases TAD remodeling activity in naive and stimulated B cells

325

326 As *Xist* RNA re-localizes to the Xi concurrently with the strengthening of TAD boundaries  
327 during B cell activation (**Figure 2A, Figure 4E-H**), we at first hypothesized that *Xist* RNA  
328 is required to strengthen of TADs on the Xi during this process. We used our DNA FISH  
329 TAD assay to examine three regions across the X chromosome in which TAD structures  
330 emerged in stimulated B cells in Hi-C heatmaps (*Stk26*, *Nsdhl*, *Ppof1*) and one control  
331 region that lacked TADs in stimulated B cells (*Xiap*) (**Figure 5C - 5F**). We measured the  
332 center to center distances and amount of probe overlap at each region in *Xist<sup>CKO</sup>* naive  
333 and stimulated (24hr) B cells and compared measurements to the combined Xi and Xa  
334 results from our F1 B cells to assess TAD remodeling activity. For *Stk26*, *Nsdhl*, and  
335 *Ppof1* regions, we found that *Xist<sup>CKO</sup>* naive B cells had significantly shorter center to center  
336 distances and greater probe overlap compared to wildtype naive and stimulated B cells  
337 (**Figure 5C, 5D, 5E**), reflecting increased TAD remodeling activity. B cell activation did  
338 not change probe distances or overlap for *Xist<sup>CKO</sup>* cells, indicating that activation does not  
339 further increase loop extrusion/TAD remodeling seen in naïve B cells (**Figure 5C, 5D,**  
340 **5E**). At the *Xiap* locus that lacks TADs in activated wildtype cells B cells, we did not

341 observe changes in center to center distances in *Xist*<sup>CKO</sup> cells, but did see increased probe  
342 overlap compared to wildtype B cells (**Figure 5F**). Thus, despite the lack of localization  
343 of Xist RNA to the Xi in naïve B cells, *Xist* deletion changes the Xi structure, resulting in  
344 increased TAD boundary remodeling, likely reflecting increased frequency of TAD  
345 contacts across the Xi chromosome.

346

## 347 **DISCUSSION**

348

349 Unlike most somatic cells, B cells utilize dynamic XCI maintenance mechanisms for  
350 dosage compensation on the Xi. During this process, Xist RNA and heterochromatic  
351 modifications, absent in naïve B cells, localize to the Xi following mitogenic stimulation  
352 prior to the first cell division. How the absence of epigenetic modifications in naive B cells  
353 and the dynamic recruitment of epigenetic modifications to the Xi following B cell  
354 activation impacts either gene expression or Xi chromatin configuration has remained  
355 unclear. Using various allele-specific approaches to identify gene expression from the Xi  
356 and assess compaction and the presence TAD-like structures, we provide the first  
357 evidence that Xi territory compaction and small scale organization across the Xi influence  
358 XCI maintenance and female biased X-linked gene expression in lymphocytes, potentially  
359 contributing to female biased autoimmune disease. In addition, our studies identify a  
360 novel role for *Xist* in regulating the territory and folding of Xi in naive and *in vitro* stimulated  
361 B cells.

362

363 As Xist RNA and heterochromatic marks are missing from the Xi in naive B cells, we  
364 speculated that the Xi would likely exhibit high levels of transcription and gene escape.  
365 Surprisingly, we find that Xi is largely dosage compensated in naive B cells, yet ~70 X-  
366 linked genes are expressed from the Xi. There are a number of immunity-related X-linked  
367 genes that escape XCI in B cells (**Figure 1**; genes in orange) which include *Was*, *Ii2rg*,  
368 *Irak1*, and *Ikbkg*, raising the intriguing possibility that increased expression of X-linked  
369 immunity genes might contribute towards loss of B cell tolerance in female-biased  
370 autoimmune diseases. Although the autoimmune-associated gene *TLR7* does escape  
371 XCI in some human B cells<sup>39,52</sup>, we did not detect significant expression of *Tlr7* from the  
372 Xi in either naive or *in vitro* stimulated B cells. Despite the return of Xist RNA and  
373 heterochromatic marks to the Xi<sup>36</sup>, stimulated B cells have a significant number of XCI  
374 escape genes (~93 X-linked genes), many of which also escape in naive B cells.  
375 However, more X-linked chromatin remodelers escape XCI in stimulated B cells (**Figure**  
376 **1**; genes in green), including *Smc1a* and *Msl3*. As expression of these genes coincides  
377 with the appearance of TAD-like structures across the Xi, it is intriguing to consider that  
378 XCI escape of X-linked chromatin regulators contribute to genome-wide chromatin  
379 reorganization that occurs in activated B cells.

380  
381 Global B cell genome reorganization occurs at 10-33 hrs post-stimulation<sup>41</sup>, and our work  
382 demonstrates that Xist RNA transcripts are recruited back to the Xi within this same time-  
383 frame. Using Xist CHARTseq, we confirm that Xist RNA is indeed absent across the Xi in  
384 naive B cells, as previously observed in Xist RNA FISH imaging<sup>36,39</sup>, and that Xist RNA  
385 transcripts begin appearing on the Xi starting at 12 hours post stimulation (**Figure 2**).

386 Between 12 and 24 hours, Xist RNA transcripts accumulate uniformly across the Xi  
387 (**Figure 2**), confirming our prior Xist RNA FISH imaging results<sup>36</sup>. Importantly, our findings  
388 are distinct from what has been described for XCI initiation during which Xist RNA first  
389 accumulates at gene-rich islands then spreads to gene poor regions<sup>53</sup>. As our findings  
390 indicate that dynamic XCI maintenance differs from XCI initiation, we propose that despite  
391 the lack of robust Xist RNA localization in naïve lymphocytes, epigenetic memory guides  
392 the return of Xist RNA transcripts to the Xi following B cell activation.

393  
394 Using allele-specific Hi-C, we saw coarser grained and attenuated compartments on the  
395 Xi in naive and *in vitro* stimulated B cells, and the existence of previously reported Xi-  
396 specific mega-domains (**Figure 3A-B**)<sup>27,30,32</sup>. Our Hi-C experiments suggest that  
397 compartmentalization does not differ between naive and stimulated B cells, however the  
398 two mega-domains have stronger boundary insulation after CpG induced activation.  
399 Interestingly, when comparing chromosome compaction, we found that Xi territory in B  
400 cells was more similar to that of the Xa in B cells than it was to the Xi in fibroblasts (**Figure**  
401 **3C-G**), with the Xi being more compact than the Xa of B cells but less compact than the  
402 Xi of fibroblasts as assessed by both surface area and sphericity. Notably, such a  
403 difference in Xi compaction may contribute towards the increased XCI escape observed  
404 across the Xi in B cells compared to fibroblasts. Indeed, the reduced compaction of the  
405 Xi in B cells may allow for rapid gene expression changes from the Xi in response to  
406 immune stimuli.

407

408



409 Our work provides the first evidence that the Xi can be quickly remodeled in somatic cells,  
410 where TAD boundaries on the Xi increase in strength in response to B cell stimulation.  
411 While we did not detect TAD structures across the Xi in naive B cells in this study, it is  
412 possible that TADs could be detected across the Xi in naive B cells with higher  
413 sequencing depth. Significantly, TADs appeared in stimulated B cells which had not yet  
414 undergone the first cell division (**Figure 4**), initiated by small-scale remodeling across the  
415 Xi starting at 12 hours post-stimulation, in parallel with localization of Xist RNA transcripts  
416 across the Xi (**Figure 2**). Using immunofluorescence, we have previously shown that the  
417 heterochromatic modifications H3K27me3 and H2AK119-ubiquitin also appear on the Xi  
418 at this time<sup>36</sup>, which may reflect changes with TAD remodeling. In support, use of 2-color  
419 TAD specific probes for DNA FISH revealed TAD remodeling at the *Nsdhl* region and a  
420 visually stronger TAD boundary, which exhibits changes in insulation score after  
421 stimulation.

422  
423 XCI escape genes are typically enriched for TAD structures, and our study found  
424 examples of XCI escape genes that contain TAD structures (*Nsdhl*) as well as those that  
425 are expressed in stimulated B cells despite lack of either TAD-like structures (*Xiap*) or  
426 evidence of TAD remodeling in stimulated B cells (**Figure 4**). In addition, our study  
427 identified repressed X-linked genes (*Ppef1*) with increased TAD interactions in Hi-C  
428 heatmaps and evidence of TAD remodeling in stimulated B cells (**Figure 5E**; wildtype  
429 cells). Thus, in stimulated B cells, TADs and TAD boundary remodeling activity on the Xi  
430 does not strictly correlate with gene expression. A recent study documented TAD  
431 formation across the Xi occurring prior to Xi reactivation during mouse iPSC

432 reprogramming<sup>54</sup>, suggesting that transcription is independent of 3D chromatin  
433 organization<sup>55,56</sup>. In contrast, correlations between loss of TAD structures and gene  
434 repression restriction of TADs to XCI escape regions during imprinted XCI, supports a  
435 positive correlation between Xi gene expression and TAD remodeling<sup>57</sup>. In B cells with  
436 dynamic XCI maintenance, the Xi in both naive and *in vitro* stimulated B cells is dosage  
437 compensated, but only stimulated B cells have localized Xist RNA and heterochromatic  
438 marks at the Xi. However, as these stimulated cells have not yet divided, it is possible  
439 that cycle re-entry is required to observe a positive correlation between TADs and XCI  
440 escape genes. Future studies examining how abnormal overexpression of X-linked genes  
441 and loss of Xist RNA re-localization in autoimmune disease<sup>38,58</sup> impacts TAD remodeling  
442 across the Xi may provide additional insight into the relationship between transcription  
443 and chromatin organization on the Xi.

444

445 *Xist* deletion in embryonic stem cells, NPCs, and fibroblasts significantly reconfigures the  
446 Xi organization during XCI initiation and maintenance<sup>27,59</sup>. However, as Xist RNA does  
447 not localize to the Xi in naive B cells, we were surprised that *Xist* deletion increased total  
448 nuclear volume and nuclear surface area in both naive and stimulated B cells (**Figure 5**).  
449 While our OligoPaint probes revealed reduced X chromosome compaction in *Xist*<sup>CKO</sup> B  
450 cells, it can only provide indirect evidence that the Xi chromosome is larger as we cannot  
451 distinguish X alleles in *Xist*<sup>CKO</sup> B cells. Therefore, we used the TAD remodeling assay to  
452 examine the impact of *Xist* deletion on TAD boundaries on the Xi. Notably, *Xist* deletion  
453 increases TAD remodeling, with greater overlap and shorter distances between TAD  
454 specific probes at all four X-loci examined, even in *Xist*<sup>CKO</sup> naive B cells, where Xist RNA

455 is not localized to the Xi. As the changes to Xi organization were not further altered after  
456 *in vitro* stimulation of *Xist*<sup>CKO</sup> B cells, loss of *Xist* transcription may disrupt the Xi  
457 organizational structure to a level where stimulation does not have an additional impact.  
458 We envision two models for *Xist*-mediated regulation of Xi compaction and TAD  
459 formation: 1. *Xist* transcription is necessary for Xi compaction and attenuated TAD  
460 interactions across the Xi, 2. *Xist* RNA itself acts as a molecular scaffold for chromatin  
461 organization/remodeling complexes that bind RNAs (including *Xist* RNA<sup>59</sup>), to prevent  
462 additional binding across the Xi. Previous work demonstrated that the Xi contains fewer  
463 architectural proteins, and that *Xist* RNA interacts with the cohesin complex to evict  
464 cohesins from certain regions across the X chromosome during XCI initiation<sup>59,60</sup>.  
465 Therefore, in the absence of *Xist* RNA, cohesin proteins may aberrantly accumulate  
466 across the Xi in B cells, resulting in increased looping interactions. Future work is needed  
467 to determine whether cohesin binding increases across the Xi when *Xist* is deleted in B  
468 cells and if *Xist* is necessary for maintaining Xi compaction and chromosome structure in  
469 both naive and stimulated B cells by modulating local *cis* interactions across the Xi,  
470 possibly through cohesin-mediated interactions.  
471

472 **ACKNOWLEDGEMENTS**

473

474 We would like to thank A. Kritz for sharing the protocol and providing invaluable input on  
475 CHART experiments; D.Beiting and PennVet CHMI for their help with sequencing; B.  
476 Gregory and X. Yu for generating the code for the allele-specific RNAseq pipeline; D.J.  
477 Emerson for advice on Hi-C analyses; L. King for help with manuscript editing; and all  
478 members from Anguera, Joyce, and Cremins labs for helpful discussions. This research  
479 was supported by an NIH R01 AI134834 (to M.C.A.), NIH 1F31GM136073-01 (to I.S.),  
480 NIGMS R35GM128903 (E.F.J.), 4D Nucleome Common Fund grants U01DA052715  
481 U01DK127405, and R01 MH120269, 1U01DA052715, 1 DP1 MH129957 (to Phillips-  
482 Cremins).

483

484 **AUTHOR CONTRIBUTIONS**

485

486 Conceptualization, I.S., M.C.A., J.E.P-C., E.F.J.; Methodology, I.S., S.C.N., M.C.A.,  
487 E.F.J., J.E.P-C.; Investigation, I.S., Z.T.B.; Software, S.C.N.; Formal Analysis, I.S.,  
488 H.S.R., A.L.C., R.J.B., Z.T.B.; Resources, S.C.N.; Manuscript Writing I.S. and M.C.A;  
489 Manuscript Review & Editing, I.S., M.C.A., S.C.N., R.J.B., A.L.C., E.F.J., J.E.P-C.;  
490 Funding Acquisition, I.S., M.C.A.

491

492 **Declaration of interests**

493

494 The authors declare no competing interests.

495

496 **FIGURE LEGENDS**

497

498 **Figure 1. The inactive X in B cells is dosage compensated and has XCI escape**

499 **genes in both naive and *in vitro* stimulated B cells. A) Left - Schematic for the F1 Mus**

500 **x Cast mouse with completely skewed XCI. Female *Mus musculus* (*Musculus*)**

501 **heterozygous for *Xist* deletion (*Xist* $\Delta$ ) is mated to a wild-type male *Mus castaneus***

502 **(*Castaneus*) mouse. The F1 generation expresses *Xist* exclusively from the *Castaneus***

503 **allele, thus the wildtype Xi is paternally inherited (*Castaneus*) in every cell of this mouse.**

504 **Right – Schematic for the splenic follicular B cell isolation procedure used throughout this**

505 **study. Naive CD23<sup>+</sup> follicular B cells are stimulated *in vitro* with CpG for 24 hours. B)**

506 **Allele-specific RNAseq analyses showing reads per million mapped (RPM) of X-linked**

507 **reads mapping to either the Xi (*Cast*, purple) or Xa (*Mus*, teal) genomes in both naive and**

508 **stimulated B cells. Bars represent mean  $\pm$  SD. Statistical test performed using One-way**

509 **ANOVA with Tukey's correction for multiple comparisons. \*\* p-value < 0.005, \*\*\*\* p-value**

510 **< 0.0001. C) X chromosome plots generated by chromoMap<sup>61</sup> showing the genomic**

511 **location of Xi-specific expression in naive (blue) and stimulated (coral) B Cells. Values**

512 **are displayed as the sum of RPKM in 1.7Mb bins. Dotted lines display location of the *Xist***

513 **locus. Colored regions represent annotated regions of the X chromosome, black bars**

514 **represent un-mappable regions. D) Venn diagram showing the distribution of the 104 XCI**

515 **escape genes identified in naive and stimulated B cells (11 naive specific; 33 stimulated**

516 **specific; 60 shared). E) X chromosome maps showing the location of each XCI escape**

517 **gene. Genes are listed in linear order as they appear across the X chromosome. Colored**

518 **arrows indicate location of XCI escape genes for either naive (left) or stimulated (right) B**

519 cells. *Xist* and *Dxz4* boundary are indicated with red lines. Genes colored in orange have  
520 immune-related functions. Genes colored in green have chromatin organization functions.  
521 Underlined genes are novel escapees identified in this study.

522

523 **Figure 2. CHARTseq analysis mapping the return of *Xist* RNA transcripts to the Xi**

524 **during B cell stimulation. A)** Schematic of *Xist* RNA localization patterns during B cell

525 stimulation observed using RNA FISH<sup>36</sup>. **B)** Xi-wide *Xist* RNA accumulation for 0, 12hr,

526 and 24hr timepoints post-stimulation. Results from two replicate F1 animals are shown.

527 Positive values represent the smoothed enrichment of *Xist* RNA over input with a scale

528 of -20 – 40. Gray bars are un-mappable regions, blue bars highlight regions showing

529 depleted *Xist* RNA. Inset image is a re-scaled and zoomed in view of *Xist* RNA transcripts

530 mapping to the *Xist* promoter. **C)** *Xist* RNA enrichment at the *Xist* gene, a region 2Mb

531 upstream and downstream of the *Xist* gene, and all Xi mappable regions (excluding *Xist*)

532 using 10kb bins. Whiskers show min to max values. **D)** Annotation of mapped *Xist* RNA

533 enrichment peaks from 24 hour samples (identified using MACS2 and CHIPSeeker) to

534 genic and intergenic features across the Xi. Pie chart displays average percentages from

535 n = 2 replicates. **E)** Comparison of *Xist* RNA transcript levels ('*Xist* RNA enrichment') at

536 regions lacking detectable *Xist* RNA signals (blue highlighted regions in **A**) compared to

537 all mappable regions (excluding *Xist*) on the Xi using 100kb bins. Whiskers show min to

538 max values. All statistics were performed using a Kruskal-Wallis test, \* p-value < 0.05,

539 \*\*\*\* p-value < 0.0001.

540

541 **Figure 3. The Xi lacks A/B compartment structures, and the Xi in B cells is less**  
542 **compact than the Xi in primary fibroblasts. A)** Allele-specific Hi-C heatmaps at 200kb  
543 resolution of each X chromosome from naive and *in vitro* stimulated (for 24 hours) B cells  
544 from F1 mice. Green arrow denotes *Dxz4* boundary region that separates two mega-  
545 domains on Xi. Below are A/B compartment tracks depicting A compartments in green, B  
546 in red. Scale is  $-5E-2$  –  $+5E-2$ . **B)** Hi-C heatmaps binned at 30kb resolution showing the  
547 *Dxz4* boundary region (chrX:70970797-74970797) on the Xi in naive and stimulated (24  
548 hours) B cells. **C)** Haplotype OligoPaints (HOPs) DNA FISH imaging for distinguishing  
549 the Xi and Xa in F1 B cells and F1 primary fibroblasts. Simplified diagram of probe design  
550 for allele-specific resolution of each X chromosome. Probes label the Xi (cyan) and the  
551 Xa (pink) in control F1 primary fibroblasts and in naive and stimulated B cells. **D)** Surface  
552 area measurements of each X chromosome territory, calculated as an Xa/Xi ratio. \*\*\* p-  
553 value  $<0.001$ . **E)** Allele-specific surface area measurements of each X chromosome  
554 territory normalized by total nuclear size. **F)** Sphericity measurements of X chromosome  
555 territories, calculated as an Xa/Xi ratio. \*\* p-value  $<0.005$ . **G)** Raw allele-specific  
556 measurements of sphericity for each chromosome territory. All violin plots show median  
557 with quartiles. All boxplots show median with quartiles and min to max whiskers. Statistics  
558 performed using a Kruskal-Wallis test, \*\*p-value = 0.0089, \*\*\*\*p-value  $<0.0001$ . Hi-C  
559 experiments had n = 2 female mice/timepoint. Imaging experiments had n = 3 female  
560 mice/category.

561  
562 **Figure 4. Stimulation influences TAD boundary strength on the Xi. A)** 30kb resolution  
563 Hi-C heatmap of a region (chrX: 65674654 – 72500000) on the Xi chromosome in Naive

564 (left) and Stim (right) B cells. Green arrows denote increased TAD interactions on the  
565 stimulated Xi. Escape genes shown below: N = naive escapee; S = stim escapee; B =  
566 escape in both. **B)** 30kb resolution Hi-C map of a region (chrX: 158373375 – 166000000)  
567 on the inactive X chromosome in Naive (left) and Stim (right). Green arrows denote  
568 increased TAD interactions on the stimulated Xi. Escape genes shown below: S = stim  
569 escapee; B = escape in both. **C)** 30kb resolution Hi-C heatmap of a 4Mb region (chrX:  
570 98655712 – 102655712) surrounding the *Xist* gene on the inactive X chromosome. **D)**  
571 Plot showing change in insulation score at escape genes (left) or genes subject to  
572 silencing on the Xi (right). **E)** Hi-C heatmaps of the Xi in naive and stimulated B cells  
573 centered on the *Nsdhl* region. TAD probes are shown below (green, purple).  
574 Representative images of individual nuclei using TAD probes for naive and stimulated B  
575 cells (12 hrs, 24 hrs) with Xi labeled in yellow. TADs for both alleles are shown in zoomed  
576 panels. White arrowheads denote the Xi. Scale bars are 5 $\mu$ m. **F)** Center to center  
577 distances between *Nsdhl* TAD probes (left) and boxplot of percent overlap for the probes  
578 (right). Percent overlap is normalized to the volume of the green probe. **G)** Hi-C heatmaps  
579 of the Xi in naive and stimulated B cells centered on *Xiap* with TAD probe regions shown  
580 below (green, magenta). Right – representative images of single nuclei at naive, 12 hrs,  
581 and 24 hrs with TAD and Xi labeled in yellow. TADs for both alleles are shown in zoomed  
582 panels. White arrowheads denote the Xi-specific allele. Scale bars are 5 $\mu$ m. **H)** Center to  
583 center distance between *Xiap* TAD probes (left) and boxplot of percent overlap (right).  
584 Percent overlap is normalized to the volume of the green probe. For imaging experiments,  
585 n=3 for 0 hr and 24 hr timepoints, n=2 for 12hr timepoint. Statistics were performed using  
586 a Kruskal-Wallis test, \*\*\* p-value < 0.0005.



587

588 **Figure 5. Loss of *Xist* increases nuclear size, reduces Xi compaction, and increases**

589 **TAD remodeling activity in B cells. A)** Diagram of *Xist* deletion in mature B cells using

590 Mb1-Cre Recombinase mouse matings. Mature naive *Xist<sup>CKO</sup>* and *in vitro* stimulated

591 splenic *Xist<sup>CKO</sup>* B cells were used for experiments. Measurements of total nuclear volume

592 (left) and total nuclear surface area (right) for wildtype (n= 3 replicate mice) and *Xist<sup>CKO</sup>*

593 cells (n= 3 replicate female mice). Statistical significance determined using Kruskal-Wallis

594 test. \*\*\* p-value = 0.0005, \*\*\*\* p-value < 0.0001. **B)** Left – non allele-specific imaging of

595 *Xist<sup>CKO</sup>* X chromosomes using OligoPaints. Scale bars are 10um. Right – Surface area,

596 and sphericity measurements of the absolute difference of the X chromosomes in wild-

597 type (purple; n=3 replicates) and *Xist<sup>CKO</sup>* (peach/dark purple; n = 3 replicates) samples,

598 for both naive and stimulated (24 hrs) B cells. \*\* p-value < 0.005, \*\*\* p-value = 0.0008.

599 Plots show median with quartiles. **C-F)** Hi-C heatmaps of the Xi in naive and stimulated

600 B cells with 2-color probes (green, magenta) for measuring TAD proximity centered (+/-

601 2Mb) on the **C)** *Stk26* region; **D)** *Nsdhl* region; **E)** *Ppof1* region; **F)** *Xiap* region. Images

602 show representative nuclei for each condition (n = 3 replicate mice for each genotype);

603 TAD imaging scale bars are 5um. Measurements of center to center distances between

604 TAD probes (above) and percent overlap between TAD probes (below). Percent overlap

605 is normalized to the volume of the green probe within in each pair. \* p-value < 0.05, \*\* p-

606 value < 0.005, \*\*\*p-value = 0.0007, \*\*\*\* p-value < 0.0001 using a Kruskal-Wallis test.

607 White arrowheads denote the Xi allele in F1 wild-type cells.

608

609 **Figure S1. XCI escape genes in naive and stimulated B cells. A)** PCA plot of naive  
610 (purple) and 24 hour stimulated (teal) B cells. **B)** ChromoMaps comparing aggregate  
611 RPKM expression of the Xa and the Xi in naive (top) and stimulated (bottom) B cells. The  
612 Xa is scaled to match the Xi. **C)** Heatmap showing z-scores of the Xi-specific expression  
613 of the 60 XCI escape genes expressed in both naive and stimulated B cells. Genes in  
614 orange have immunity-related functions; genes in green have roles in chromatin  
615 organization. **D)** Metascape analysis of all 104 XCI escape genes in B cells.

616  
617 **Figure S2. Xist RNA CHARTseq showing background of Xist RNA transcripts**  
618 **across two autosomal chromosomes.** Xist RNA CHARTseq results for n=2 naive and  
619 stimulated B cells at 12 and 24 hour timepoints on chromosomes 4 and 13. Positive  
620 values represent the smoothed enrichment of Xist RNA over input with a scale of -20 –  
621 40; gray bars are un-mappable regions. The Xist RNA transcripts mapping to  
622 chromosomes 4 and 13 are background, and this level of enrichment is similar to the X  
623 chromosome in naive B cell samples in Figure 2.

624  
625 **Figure S3. Allele-specific Hi-C maps for chromosome 13 and cumulative**  
626 **distributions of imaging measurements for Xi and Xa. A)** 200kb resolution Hi-C  
627 heatmaps of Chromosome 13 displaying both maternal (Mus) and paternal (Cast) alleles  
628 for naive and 24 hour stimulated B cells. **B)** Cumulative proportion plots for surface area  
629 of the Xi relative to total X chromosome surface area in fibroblasts (black), naive B cells  
630 (light cyan), and stimulated B cells (dark cyan). **C)** Cumulative proportion plots for surface  
631 area of the Xa to total X chromosome surface area in fibroblasts (black), naive B cells

632 (light coral), and stimulated B cells (dark coral). **D)** Cumulative proportion plots for  
633 sphericity of the Xi to total X chromosome in fibroblasts (black), naive B cells (light cyan),  
634 and stimulated B cells (dark cyan). **E)** Cumulative proportion plots for sphericity of the Xa  
635 relative to total X chromosome in fibroblasts (black), naive B cells (light coral), and  
636 stimulated B cells (dark coral). Significance was determined by Kruskal-Wallis test, \*\*\*\*  
637 p-value <0.0001.

638  
639 **Figure S4. Hi-C maps showing TAD structures on the Xa and plots of gene**  
640 **enrichment at TADs on the Xi. A)** 30kb Hi-C heatmap of a 12Mb region (chrX: 65674654  
641 – 77674654) on the Xa in naive (left) and 24 hrs stimulated (stim) B cells. **B)** 30kb Hi-C  
642 map of a 12Mb region (chrX: 154373375 – 166373375) on the Xa in naive (left) and  
643 stimulated B cells (right). **C)** 30kb Hi-C heatmap of a 4Mb region (chrX: 98655712 –  
644 102655712) encompassing the *Xist* gene on the Xa. There is a region of *Xist* deleted on  
645 the Xa, and therefore this map may not represent the true structure of the wild-type *Xist*  
646 locus on the Xa. **D)** 30kb Hi-C maps of a 4Mb region (chrX: 152136905 – 156136905)  
647 centered on the transcriptionally silent gene region of *Smpx* (+/- 2Mb) for both the Xa  
648 (top) and the Xi (bottom) in naive and stimulated B cells.

649

650 **Methods**

651

652 Mice

653 *Xist<sup>fl/fl</sup>* mice (129Sv/Jae strain) were a gift of R. Jaenisch<sup>62</sup>. To generate female F1 mice  
654 we used the following mating scheme: For RNAseq experiments, *Xist<sup>fl/fl</sup>* mice were bred  
655 to E2a-Cre (B6.FVB-Tg(Ella-cre)C5379Lmgd/J, strain# 003724, Jackson) males to  
656 generate heterozygous *Xist<sup>fl/+</sup>* females. Heterozygous females were then bred with wild-  
657 type *Mus castaneus* (Cast) males to generate F1 *Xist<sup>fl/+</sup>* female mice. For all other allele-  
658 specific experiments, the following mating scheme was used: *Xist<sup>fl/fl</sup>* female mice  
659 (C57BL/6j; strain# 000664, Jackson) were mated to an ACTB-Cre male (B6N.FVB-  
660 *Tmem163<sup>Tg(ACTB-cre)2Mrt</sup>/CjDswJ*; strain# 019099, Jackson) to generate heterozygous  
661 *Xist<sup>fl/+</sup>* females. Heterozygous females were then bred with wild-type *Mus castaneus*  
662 (Cast) males to generate F1 *Xist<sup>fl/+</sup>* female mice. F1 *Xist<sup>fl/+</sup>* females from both mating  
663 schemes always inactivate the paternal WT Cast X chromosome. To generate the B cell  
664 specific knockout, *Xist<sup>fl/fl</sup>* (C57BL/6j; strain# 000664, Jackson) mice were bred to an Mb1-  
665 Cre line (B6.C(Cg)-*Cd79a<sup>tm1(cre)Reth</sup>/Ehobj*; strain# 020505; Jackson) to generate mice  
666 heterozygous for Mb1-Cre and homozygous for *Xist<sup>fl/fl</sup>* (*Mb1-cre<sup>+</sup> Xist<sup>fl/fl</sup>*). All mice were  
667 maintained at the Penn Vet animal facility, and experiments were approved by the  
668 University of Pennsylvania Institutional Animal Care and Use Committee (IACUC).  
669 Euthanasia via carbon dioxide was used for animal sacrifice prior to isolations.

670

671 B cell isolations

672 Follicular B cell isolations were performed as previously described using a positive  
673 selection kit<sup>36</sup>. Briefly, spleens from mice aged 3-6 months of age were crushed to  
674 produce single cell suspensions. Cells were incubated with Biotin tagged anti-CD23  
675 (Clone B3B4, 101604, Biolegend), then incubated with streptavidin microbeads  
676 (130048101, Miltenyi). Cells were run through an LS column (130042401, Miltenyi)  
677 attached to a magnet. Positively selected follicular B cells were eluted from the column,  
678 and either collected immediately for experiments (0 hr/Naive timepoint) or stimulated with  
679 1uM CpG (tlrl-1826, Invivogen) and collected at 12 hrs or 24 hrs for ‘stimulated B cell’  
680 samples.

681

#### 682 Primary fibroblast isolations

683 Primary adult mouse fibroblasts were isolated exactly as previously published<sup>63</sup>. Ears  
684 from n= 3 replicate female F1 mice were removed post-mortem and cut into 3mm size  
685 pieces. Tissue was incubated in collagenase D-pronase solution [2.5mg/ml collagenase  
686 D supplemented with 250ul of 20mg/ml pronase in 4ml total] for 90min at 37C with  
687 200rpm. Digested tissue was ground and filtered through a 70um cell strainer into  
688 complete medium [RPMI with 10% fetal calf serum, 50uM 2-mercaptoethanol, 100uM  
689 asparagine, 2mM glutamine, 1% penicillin-streptomycin]. Cells were spun for 7min at  
690 580g at 4C and washed once with complete medium. Cells were plated with 10ml of  
691 complete medium supplemented with 10ul amphotericin B [250ug/ml stock]. Cells were  
692 cultured at 37C with 5% CO<sub>2</sub>, media was replaced on third day with fresh amphotericin  
693 B. At 70% confluency cells were split one time and sub-cultured for 2-3 days before  
694 collection and cytopinning onto slides as previously described<sup>36</sup>.

## 695 Allele-specific RNAseq sequencing

696 B cells from n = 3 replicate F1 mus x cast female mice at either 0 hr or 24 hrs post  
697 stimulation were collected into TRIzol reagent (15596026, ThermoFisher). RNA isolations  
698 were performed according to the manufacturers protocol. Libraries were prepared with an  
699 Illumina TruSeq Stranded Total RNA LT kit (20020596, Illumina). Libraries were pooled  
700 and run on an Illumina NextSeq 500 sequencer (150bp paired-end).

701  
702 To quantify gene expression from the 129S1 genome (129S1/SvlmJ, accession#  
703 ERS076385, Sanger Institute)<sup>64</sup>, RNA-seq reads were first aligned to the Castaneus  
704 genome (CAST/EiJ, accession# ERS076381, Sanger Institute)<sup>64</sup> using STAR (v2.6.0a)  
705 with default parameters, except for the outSAMunmapped flag, which was set to Within  
706 KeepPairs to allow for unmapped reads to be extracted from alignment output. Unmapped  
707 reads were extracted using samtools and converted to Fastq format using bamToFastq.  
708 These reads were then aligned to the 129S1 genome using STAR with the  
709 outFilterMultimapNmax flag set to 1 to filter out reads that mapped to more than one loci.  
710 With the output from this second alignment, HTSeq-count (v0.10.0) was used to count  
711 allele-specific reads mapping to genes in the 129S1 genome. To quantify gene counts  
712 from the Cast genome, the same strategy was employed, except reads were first mapped  
713 to the 129S1 genome and unmapped reads were mapped to the Cast genome.

714  
715 Genes that escape XCI were identified using 3 thresholds of escape, as previously  
716 described<sup>65,66</sup>. Briefly, diploid gene expression was first calculated in RPKM (reads per  
717 kb of exon length, per million mapped reads), and genes were called as expressed if their

718 diploid RPKM was  $> 1$ . For every X-linked gene that passed this threshold, haploid gene  
719 expression was calculated in SRPM (allele-specific SNP-containing exonic reads per 10  
720 million uniquely mapped reads), and genes which had an Xi-SRPM  $> 2$  were considered  
721 to be expressed from the Xi. Finally, a binomial model estimating the statistical confidence  
722 of escape probability was applied to the genes passing the first 2 thresholds. This model  
723 compares the proportion of Xi-specific reads to the total Xi + Xa reads and calculates a  
724 95% confidence interval. If the 95% lower confidence limit of a gene's escape probability  
725 was greater than 0, it was called an escapee. Genes that escaped XCI were grouped by  
726 their escape status in naive and stimulated cells, which produced 3 different categories:  
727 genes that escape in naive cells only, genes that escape in stimulated cells only, and  
728 genes that escape in both naive and stimulated cells.

729  
730 Reads were graphed using Prism v9.3.1, statistical significance was determined using  
731 one-way ANOVA with Tukey's multiple comparison test. The R package chromoMap was  
732 used to generate chromosome maps displaying aggregate RPKMs<sup>61</sup>. Venn diagram of  
733 escape genes was generated using VennDiagram package in R. Heatmaps were  
734 generated using RPM values of genes as input to the gplots function heatmap.2 in R with  
735 data scaling set to "row". GO analysis was performed using Metascape<sup>67</sup>.

736  
737 Capture hybridization of RNA targets (CHART)

738 CHART protocol was performed as previously described<sup>15,30</sup>. Splenic follicular B cells  
739 were isolated at 0 hr, 12 hrs, and 24 hrs post CpG stimulation (n=2 mice per timepoint,  
740 25 million cells/replicate). Cells were crosslinked in 1% formaldehyde for 10min at room

741 temperature. Cells were incubated in sucrose buffer [0.3M sucrose, 1% Triton X-100,  
742 10mM HEPES, 100mM KOAc, 0.1mM EGTA, 0.5mM Spermidine, 0.15mM Spermine, 1x  
743 complete EDTA-PIC, 10U/ml SUPERasIn (AM2696, Thermo Scientific)] and nuclei  
744 isolated through 20 passes in a dounce homogenizer with a tight pestle. Nuclei were  
745 collected through centrifugation in glycerol cushion [25% glycerol, 10mM HEPES, 1mM  
746 EDTA, 0.1mM EGTA, 100mM KOAc, 0.5mM Spermidine, 0.15mM Spermine, 1x complete  
747 EDTA-PIC, 1mM DTT, 5U/ml SUPERasIn]. Nuclei were crosslinked again in 3%  
748 formaldehyde for 30min at room temperature. Crosslinked nuclei were incubated for  
749 10min at 4C in nuclear extraction buffer [50mM HEPES, 250mM NaCl, 0.1mM EGTA,  
750 0.5% N-lauroylsarcosine, 0.1% sodium deoxycholate, 5mM DTT, 10U/ml SUPERasIn].  
751 Nuclei were spun down and resuspended in sonication buffer [50mM HEPES, 75mM  
752 NaCl, 0.1mM EGTA, 0.5% N-lauroylsarcosine, 0.1% sodium deoxycholate, 0.1% SDS,  
753 5mM DTT, 10U/ml SUPERasIn], and sonicated in a Covaris S220 sonicator with the  
754 following conditions: PIP – 140W; Duty factor – 10%; Cycles – 200; for a total of 8mins at  
755 4C [Of note, the 0 hr samples required a longer sonication time of 10mins]. Sonicated  
756 lysates were pre-cleared with MyOne Streptavidin C1 beads (65001, Thermo Scientific)  
757 for 1hr at room temperature in 2X hybridization buffer [50mM Tris-HCl pH 7.0, 750mM  
758 NaCl, 1% SDS, 1mM EDTA, 15% formamide, 1mM DTT, 1mM PMSF, 1X PIC, and  
759 100U/mL SUPERaseIN]. Input [1%] was removed and frozen at -80C. Pre-cleared lysates  
760 were then incubated with a pool of 10 biotinylated Xist oligos<sup>15</sup> (see Supplementary Table  
761 3 for sequences) at a final concentration of 36pmol. Samples were incubated for 4hr at  
762 37C. Samples were washed once in 1X hyb buffer [33% sonication buffer, 67% 2X  
763 hybridization buffer]; five times with 2% SDS wash buffer [10mM HEPES, 150mM NaCl,



764 2% SDS, 2mM EDTA, 2mM EGTA, 1mM DTT]; and two times with 0.5% NP40 wash  
765 buffer [10mM HEPES, 150mM NaCl, 0.5% NP40, 3mM MgCl<sub>2</sub>, 10mM DTT] at 37C.  
766 Beads were resuspended with 200ul 0.5% NP40 buffer and DNA was eluted twice from  
767 beads using 20ul RNase H [5U/ul] at 37C for 30min each time. Input and eluted DNA  
768 were treated with 10ul RNase A [20mg/ml] at 37C for one hour, followed by addition of  
769 10ul Proteinase K [20mg/ml] and incubated at 55C for 1hr. After, 12ul 5M NaCl was added  
770 and samples were reverse crosslinked at 65C overnight. DNA was isolated following a  
771 standard phenol-chloroform extraction.

772

### 773 CHART sequencing and analysis

774 Library preparation was performed using the NEB Next Ultra II library prep kit. For starting  
775 material, the same concentration of DNA was used between each samples input and IP  
776 values as measured by Qubit. The samples were sequenced on a NextSeq 2000 with  
777 2x150bp read length.

778

779 For analysis, FastQ files were trimmed using Trim Galore!  
780 ([https://www.bioinformatics.babraham.ac.uk/projects/trim\\_galore/](https://www.bioinformatics.babraham.ac.uk/projects/trim_galore/)) and Cutadapt to  
781 remove adapter sequences and low quality reads and checked using FastQC. Trimmed  
782 FastQ files were aligned to the mm9 genome using Bowtie2 v2.3.4.1<sup>68</sup>. Aligned output  
783 files were sorted using samtools<sup>69</sup> and filtered using sambamba<sup>70</sup> to remove duplicates,  
784 unmapped reads, reads mapping to mitochondrial DNA, and improper pairs. Blacklist  
785 filtering<sup>71</sup> was performed using bedtools intersect<sup>72</sup>. Sorted and filtered BAM files were  
786 analyzed in R using SPP<sup>73</sup>. To generate enrichment files the function

787 get.smoothed.tag.density was used with smoothing using 1Mb windows every 500bp with  
788 input files as controls. To control for sequencing depth, files were scaled using total  
789 positive read density on chromosome 4<sup>15</sup>. Enrichment files were converted to BigWig  
790 format and visualized using IGV<sup>74</sup>. For determining Xist RNA enrichment at specific  
791 genomic regions, mappable regions were binned using bedtools makewindows at either  
792 a 10kb or 100kb window size (specified in figure legends). The *Xist* locus was excluded  
793 from the total X comparison to prevent skewing of the enrichment values. deepTools2  
794 multiBigwigSummary<sup>75</sup> was then used to extract enrichment values using the BED file  
795 outputs from bedtools. To determine genomic annotation of enrichment, peak calling was  
796 performed using the MACS2<sup>76</sup> function callpeak with paired-end BAM flag (-f BAMPE),  
797 keep duplicates set to auto, a q-value cutoff of 0.1, and with scaling set to small. Output  
798 peak file was used with the Bioconductor package ChIPseeker<sup>77</sup> to determine genomic  
799 annotations, with pie chart generated using Prism v9.3.1. UCSC Table Browser<sup>78</sup> was  
800 used to find genes located in Xist RNA depleted regions. Genes were considered  
801 expressed if the 129S1/Xa RPKM values were >0 in at least two samples. Graphs were  
802 created using Prism v9.3.1, Kruskal-Wallis statistical tests were performed to determine  
803 significance.

804

#### 805 Hi-C sequencing

806 Hi-C was performed using the Arima Hi-C+ kit (Arima Genomics, San Diego, CA, USA)  
807 following their standard protocol. 2 million cells per replicate (n = 2 mice for each  
808 timepoint) were crosslinked with 2% formaldehyde for 10 mins at RT before proceeding  
809 with Hi-C. For library preparation, the KAPA HyperPrep kit (07962312001, Roche) was

810 used with a modified protocol provided by Arima Genomics. Libraries were checked by  
811 Tapestation analysis, pooled, and run for two rounds on a NextSeq 500 with a 2x150bp  
812 read length. Two replicates were pooled to generate 400 million reads/timepoint.

813

#### 814 Allele-specific Hi-C analysis

815 We performed allele-specific Hi-C analysis using Hi-C-Pro v2.8.9 according to the allele-  
816 specific analysis section of the Hi-C-Pro manual ([https://nservant.github.io/Hi-C-](https://nservant.github.io/Hi-C-Pro/AS.html)  
817 [Pro/AS.html](https://nservant.github.io/Hi-C-Pro/AS.html)). Briefly, we generated a masked mm9 genome, in which each location of  
818 strain-specific SNPs differentiating CAST and C57Bl6 strains is N-masked. First, the  
819 NCBI37/mm9 genome was downloaded from the UCSC Genome Browser  
820 (<https://hgdownload.soe.ucsc.edu/downloads.html#mouse>). We then downloaded a  
821 database of strain-specific SNPs for a variety of mouse strains from the Sanger Institute  
822 Mouse Genomes Project (<https://www.sanger.ac.uk/data/mouse-genomes-project/>)<sup>64</sup>.  
823 Using this information, we generated a vcf file by running the extract\_snps script on Hi-  
824 C-Pro that contained SNPs that differ between CAST and C57bl6 mouse genome. We  
825 masked the reference mm9 genome at all loci of SNPs specified in the vcf file by running  
826 the `bedtools maskfasta` command  
827 (<https://bedtools.readthedocs.io/en/latest/content/tools/maskfasta.html>). Finally, we built  
828 a Bowtie index of the masked genome using the bowtie2-build indexer ([http://bowtie-](http://bowtie-bio.sourceforge.net/bowtie2/manual.shtml#the-bowtie2-build-indexer)  
829 [bio.sourceforge.net/bowtie2/manual.shtml#the-bowtie2-build-indexer](http://bowtie-bio.sourceforge.net/bowtie2/manual.shtml#the-bowtie2-build-indexer)).

830 We aligned paired-end reads from Hi-C fastq files to our masked mm9 genome using  
831 bowtie2 (global parameters: `--very-sensitive -L 30 --score-min L,-0.6,-0.2 --end-to-end --`  
832 `reorder`; local parameters: `--very-sensitive -L 20 --score-min L,-0.6,-0.2 --end-to-end --`

833 reorder). We filtered unmapped reads, non-uniquely mapped reads, and PCR duplicates  
834 (Supplementary Table 4).

835 We assembled raw cis contact matrices for each chromosome at two different time points  
836 for each allele at 30kb and 200kb resolution. X chromosome alleles were assigned such  
837 that Xa represented the C57bl6-specific allele and Xi represented the CAST-specific  
838 allele. Replicates for each condition were merged. We balanced the merged contact  
839 matrices using Knight-Ruiz balancing as previously described<sup>79,80</sup>. For each balanced  
840 matrix, we performed simple scalar normalization, where a simple scalar size factor for  
841 each pixel was calculated based on the genomic distance between pairs of bins<sup>81</sup>.

#### 842 Domain calling:

843 We used our previously published domain caller 3DNetMod<sup>80</sup>  
844 ([https://bitbucket.org/creminslab/cremins\\_lab\\_tadsubtad\\_calling\\_pipeline\\_11\\_6\\_2021/src/master/](https://bitbucket.org/creminslab/cremins_lab_tadsubtad_calling_pipeline_11_6_2021/src/master/))  
845 to identify TADs and subTADs on normalized, balanced Hi-C matrices binned  
846 at 30 kb resolution. We log transformed counts and chunked the data into both 6 Mb  
847 regions with 4 Mb overlap between adjacent regions and 3 Mb regions with 2 Mb  
848 overlap<sup>80,82,83</sup>. As previously described, we filtered sparse regions<sup>83</sup>. We considered  
849 regions to be sparse if a chunked region contained zero counts for 1/3 of all pixels on the  
850 diagonal or if it contained consecutive zeros for more than a 1500kb distance. We  
851 identified high-confidence domains by using gamma steps of 0.01 to perform a 'gamma  
852 plateau sweep' which compares distribution of communities of domains identified  
853 genome-wide<sup>83</sup>. Plateaus were identified as consecutive gamma steps resulting in the  
854 same number of communities (mean per 20 partitions). We required a minimum plateau

855 size of 16 and 8 for 6 Mb and 3 Mb chunked regions, respectively. We then merged the  
856 6 Mb and 3 Mb chunked regions and filtered out domains smaller than or equal to 150  
857 kb. We created a final set of unique boundary locations by merging redundant domains  
858 and colocalizing boundary locations. Domains were considered redundant if two domains  
859 were within +/- 60 kb on both boundary edges. Boundary locations were colocalized to  
860 share a single consistent boundary if the gap between adjacent boundaries was less than  
861 7.5% of the domain size of each of the boundaries or if boundaries were located within  
862 60 kb of each other.

### 863 Compartment calling

864 To plot A/B compartment tracks chromosome-wide, we performed eigenvector  
865 decomposition on 200 kb resolution, balanced Hi-C matrices, as was previously  
866 described<sup>84-87</sup>. In short, matrices were normalized using a global expected distance  
867 dependence mean counts value. Low coverage rows and columns were filtered, and we  
868 transformed off-diagonal counts to obtain a z-score, which was used to generate a  
869 Pearson correlation matrix. Finally, we performed eigenvector decomposition on the  
870 resultant matrix.

### 871 Boundary strength with insulation score

872 As previously described<sup>84</sup>, we calculated insulation scores chromosome-wide by applying  
873 a 300 kb square summation window with 30 kb offset in 30 kb resolution, balanced Hi-C  
874 data<sup>88</sup>. Insufficient counts occurring at the beginning and end of the chromosome were  
875 discarded. We constructed aggregate plots of mean insulation scores centered on genes

876 (+/- 300 kb around the center of each gene) for escape genes and silenced genes  
877 chromosome-wide in Xi.

#### 878 Data availability

879 All sequencing data generated in this study has been deposited to the NCBI GEO database.  
880 Access data using the following accession numbers: GSE215848 [Hi-C, CHART] and  
881 GSE208393 [RNAseq].

#### 882 Allele-specific HOPs probe libraries

883 Probes were mined for the X chromosome (mm10 genome build) using the OligoMiner  
884 design pipeline<sup>89</sup>, with the -l and -L parameters set to 42 for 42-mer oligos and the -O  
885 parameter added for overlapping oligos. The resulting set of oligos were then modified to  
886 include SNPS for the Cast/EiJ or C57BL/6NJ mouse strains, downloaded from the Mouse  
887 Genomes Project (<https://www.sanger.ac.uk/data/mouse-genomes-project/>). Strain-  
888 specific Oligopaints were selected using a similar workflow to the HOPs pipeline<sup>90</sup>.  
889 Specifically, oligos were selected based on containing at least one differential SNP in the  
890 inner 32 nucleotides of each 42-mer oligo. These oligos were purchased from  
891 CustomArray/Genscript, and probe sets were produced as described previously<sup>46</sup>.

892

#### 893 DNA FISH with OligoPaints

894 Splenic B cells (0 hr and 24 hr post CpG stimulation) from n = 3 replicate female mice  
895 were cytopspun onto slides and processed as previously described<sup>36</sup>. Slides were briefly  
896 incubated in room temperature SSCT+formamide [2X SSC, 0.1% Tween-20, 50%  
897 formamide], then pre-hybridized in SSCT+formamide for 1hr at 37C. Primary probe mix

898 [50% formamide, 1X Dextran Sulfate Mix [10% dextran sulfate, 4% PVSA, 2X SSC, 0.1%  
899 Tween-20], 10ug RNase A, 5.6mM dNTPS, 50pmol per Oligopaint probe was added to  
900 slides, sealed with rubber cement, and denatured for 30min at 80C. Slides were then  
901 hybridized overnight at 37C in a humidified chamber. Next day, slides were washed for  
902 15min in 2X SSCT [2X SSC, 0.1% Tween-20] at 60C, 10min in 2X SSCT at room  
903 temperature, then 10min in 0.2X SSC at room temperature. Secondary probe mix [10%  
904 formamide, 1X Dextran Sulfate Mix, 10pmol per secondary probe] was added to slides,  
905 sealed with rubber cement, and incubated in a humidified chamber for at least 2hr at room  
906 temperature. Slides were washed for 5min in 2X SSCT at 60C, 5min in 2X SSCT at room  
907 temperature, then 5min in 0.2X SSC at room temperature. Slides were mounted with  
908 Vectashield and imaged on a Nikon Eclipse microscope with Z-stacks set to a 0.2um step  
909 size.

910

### 911 Image analysis

912 All images were analyzed using TANGO<sup>91</sup>. The following settings were used for allele-  
913 specific images and whole X imaging in *Xist* conditional knockout cells: Nuclei – pre-filter:  
914 Fast Filters 3D; Segmentation: Hysteresis Segmenter; Post-filters: Size and Edge Filter,  
915 Morphological Filters 3D (Fill Holes 2D, Binary Close). Alleles – pre-filter: None;  
916 Segmentation: Hysteresis Segmenter; Post-filters: Size and Edge filter, Erase Spots. The  
917 following settings were used for TAD imaging: Nuclei – pre-filter: Fast Filters 3D;  
918 Segmentation: Hysteresis Segmenter; Post-filters: Size and Edge Filter, Morphological  
919 Filters 3D (Fill Holes 2D, Binary Close). TADs – pre-filter: Fast Filters 3D, Gaussian

920 Smooth; Segmentation: Hysteresis Segmenter; Post-filters: Size and Edge filter, Erase  
921 Spots.

922

923 For allele-specific X chromosome imaging, TANGO-generated raw allele-specific data  
924 files were further processed using a custom python script which utilizes the integrated  
925 density to select the true allele for each genome. Cells with overlapping chromosomes  
926 were excluded from analyses. For surface area measurements, each allele was  
927 normalized to its respective nuclear size. To generate surface area and sphericity ratios,  
928 the active X value was divided by the inactive X value within each individual cell then  
929 graphed. For proportion plots, the allele of choice ( $X_n$ ) was divided by the sum of values  
930 for both alleles for each particular measurement ( $X_n/X_i+X_a$ ). Graphs were created using  
931 the ecdf function in R. Whole X imaging in *Xist* conditional knockout cells were analyzed  
932 post segmentation by taking the absolute difference of alleles in each nucleus for each  
933 measurement. The same analysis was performed on the allele-specific data for  
934 comparison.

935

936 For all TAD imaging, alleles were filtered out if their center – to – center distance was  
937 greater than 1um (removed trans measurements between alleles), and only cells which  
938 contained two distinct alleles (two objects for each probe) were used for further analysis.

939 For allele-specific TAD imaging, whole X allele-specific probes were used in conjunction  
940 with TAD probes, but only the  $X_i$  allele was labeled with a secondary probe. The  $X_i$ -  
941 specific TADs were manually selected by proximity to the labeled  $X_i$  allele. Distances  
942 were measured using the center-to-center distance between each TAD within each allele.



943 Overlap values were normalized to the volume of one probe from each set (indicated in  
944 figure legends).

945

946 Unless specified above, all graphs were generated using Prism v9.3.1. Significance was  
947 determined by Kruskal-Wallis statistical tests performed in Prism v9.3.1.

948

#### 949 Data availability

950 All sequencing data generated in this study has been deposited to the NCBI GEO  
951 database. Access data using the following accession numbers: GSE215848 [Hi-C,  
952 CHART] and GSE208393 [RNAseq].

## 953 References

- 954 1 Borsani, G. *et al.* Characterization of a murine gene expressed from the inactive X  
955 chromosome. *Nature* **351**, 325-329, doi:10.1038/351325a0 (1991).
- 956 2 Brown, C. J. *et al.* A gene from the region of the human X inactivation centre is expressed  
957 exclusively from the inactive X chromosome. *Nature* **349**, 38-44, doi:10.1038/349038a0  
958 (1991).
- 959 3 Carolyn J. Brown, B. D. H., Jim L. Rupert; Ronald G. Lafreniere, Yigong Xing, Jeanne  
960 Lawrence, & Willard, a. H. F. The Human X/ST Gene: Analysis of a 17 kb Inactive X-  
961 Specific RNA That Contains Conserved Repeats and Is Highly Localized within the  
962 Nucleus. *Cell* **71**, 527-524 (1992).
- 963 4 Penny, G. D., Kay, G. F., Sheardown, S. A., Rastan, S. & Brockdorff, N. Requirement for  
964 Xist in X chromosome inactivation. *Nature* **379**, 131-137, doi:10.1038/379131a0 (1996).
- 965 5 Clemson, C. M., McNeil, J. A., Willard, H. F. & Lawrence, J. B. XIST RNA paints the  
966 inactive X chromosome at interphase: evidence for a novel RNA involved in  
967 nuclear/chromosome structure. *J Cell Biol* **132**, 259-275 (1996).
- 968 6 Heard, E. *et al.* Methylation of histone H3 at Lys-9 is an early mark on the X chromosome  
969 during X inactivation. *Cell* **107**, 727-738, doi:S0092-8674(01)00598-0 [pii] (2001).
- 970 7 Wutz, A., Rasmussen, T. P. & Jaenisch, R. Chromosomal silencing and localization are  
971 mediated by different domains of Xist RNA. *Nat Genet* **30**, 167-174, doi:10.1038/ng820  
972 ng820 [pii] (2002).
- 973 8 Kohlmaier, A. *et al.* A chromosomal memory triggered by Xist regulates histone  
974 methylation in X inactivation. *PLoS Biol* **2**, E171, doi:10.1371/journal.pbio.0020171  
975 (2004).
- 976 9 Chaumeil, J., Le Baccon, P., Wutz, A. & Heard, E. A novel role for Xist RNA in the  
977 formation of a repressive nuclear compartment into which genes are recruited when  
978 silenced. *Genes Dev* **20**, 2223-2237, doi:10.1101/gad.380906 (2006).
- 979 10 Tjalsma, S. J. D. *et al.* H4K20me1 and H3K27me3 are concurrently loaded onto the  
980 inactive X chromosome but dispensable for inducing gene silencing. *EMBO Rep* **22**,  
981 e51989, doi:10.15252/embr.202051989 (2021).
- 982 11 Zylicz, J. J. *et al.* The Implication of Early Chromatin Changes in X Chromosome  
983 Inactivation. *Cell* **176**, 182-197 e123, doi:10.1016/j.cell.2018.11.041 (2019).
- 984 12 Berletch, J. B., Yang, F., Xu, J., Carrel, L. & Disteche, C. M. Genes that escape from X  
985 inactivation. *Hum Genet* **130**, 237-245, doi:10.1007/s00439-011-1011-z (2011).
- 986 13 Carrel, L. & Willard, H. F. X-inactivation profile reveals extensive variability in X-linked  
987 gene expression in females. *Nature* **434**, 400-404, doi:10.1038/nature03479 (2005).
- 988 14 Engreitz, J. M. *et al.* The Xist lncRNA exploits three-dimensional genome architecture to  
989 spread across the X chromosome. *Science* **341**, 1237973, doi:10.1126/science.1237973  
990 (2013).
- 991 15 Simon, M. D. *et al.* High-resolution Xist binding maps reveal two-step spreading during  
992 X-chromosome inactivation. *Nature* **504**, 465-469, doi:10.1038/nature12719 (2013).
- 993 16 Boggs, B. A. *et al.* Differentially methylated forms of histone H3 show unique association  
994 patterns with inactive human X chromosomes. *Nat Genet* **30**, 73-76, doi:10.1038/ng787  
995 ng787 [pii] (2002).
- 996 17 Calabrese, J. M. *et al.* Site-specific silencing of regulatory elements as a mechanism of X  
997 inactivation. *Cell* **151**, 951-963, doi:10.1016/j.cell.2012.10.037 (2012).

- 998 18 Yang, F., Babak, T., Shendure, J. & Disteche, C. M. Global survey of escape from X  
999 inactivation by RNA-sequencing in mouse. *Genome research* **20**, 614-622,  
1000 doi:10.1101/gr.103200.109 (2010).
- 1001 19 Yildirim, E. *et al.* Xist RNA is a potent suppressor of hematologic cancer in mice. *Cell*  
1002 **152**, 727-742, doi:10.1016/j.cell.2013.01.034 (2013).
- 1003 20 Yang, L., Kirby, J. E., Sunwoo, H. & Lee, J. T. Female mice lacking Xist RNA show partial  
1004 dosage compensation and survive to term. *Genes Dev* **30**, 1747-1760,  
1005 doi:10.1101/gad.281162.116 (2016).
- 1006 21 Yang, L., Yildirim, E., Kirby, J. E., Press, W. & Lee, J. T. Widespread organ tolerance to  
1007 Xist loss and X reactivation except under chronic stress in the gut. *Proc Natl Acad Sci U S*  
1008 *A* **117**, 4262-4272, doi:10.1073/pnas.1917203117 (2020).
- 1009 22 Adriane, R. L. *et al.* Perturbed maintenance of transcriptional repression on the inactive  
1010 X-chromosome in the mouse brain after Xist deletion. *Epigenetics Chromatin* **11**, 50,  
1011 doi:10.1186/s13072-018-0219-8 (2018).
- 1012 23 Berletch, J. B. *et al.* Escape from X inactivation varies in mouse tissues. *PLoS Genet* **11**,  
1013 e1005079, doi:10.1371/journal.pgen.1005079 (2015).
- 1014 24 Tukiainen, T. *et al.* Landscape of X chromosome inactivation across human tissues. *Nature*  
1015 **550**, 244-248, doi:10.1038/nature24265 (2017).
- 1016 25 Jiwrajka, N. & Anguera, M. C. The X in seX-biased immunity and autoimmune rheumatic  
1017 disease. *J Exp Med* **219**, doi:10.1084/jem.20211487 (2022).
- 1018 26 Klein, S. L. & Flanagan, K. L. Sex differences in immune responses. *Nat Rev Immunol* **16**,  
1019 626-638, doi:10.1038/nri.2016.90 (2016).
- 1020 27 Giorgetti, L. *et al.* Structural organization of the inactive X chromosome in the mouse.  
1021 *Nature* **535**, 575-579, doi:10.1038/nature18589 (2016).
- 1022 28 Darrow, E. M. *et al.* Deletion of DXZ4 on the human inactive X chromosome alters higher-  
1023 order genome architecture. *Proc Natl Acad Sci U S A* **113**, E4504-4512,  
1024 doi:10.1073/pnas.1609643113 (2016).
- 1025 29 Wang, C. Y., Colognori, D., Sunwoo, H., Wang, D. & Lee, J. T. PRC1 collaborates with  
1026 SMCHD1 to fold the X-chromosome and spread Xist RNA between chromosome  
1027 compartments. *Nat Commun* **10**, 2950, doi:10.1038/s41467-019-10755-3 (2019).
- 1028 30 Wang, C. Y., Jegu, T., Chu, H. P., Oh, H. J. & Lee, J. T. SMCHD1 Merges Chromosome  
1029 Compartments and Assists Formation of Super-Structures on the Inactive X. *Cell* **174**, 406-  
1030 421 e425, doi:10.1016/j.cell.2018.05.007 (2018).
- 1031 31 Lieberman-Aiden, E. *et al.* Comprehensive mapping of long-range interactions reveals  
1032 folding principles of the human genome. *Science* **326**, 289-293,  
1033 doi:10.1126/science.1181369 (2009).
- 1034 32 Deng, X. *et al.* Bipartite structure of the inactive mouse X chromosome. *Genome Biol* **16**,  
1035 152, doi:10.1186/s13059-015-0728-8 (2015).
- 1036 33 Chadwick, B. P. & Willard, H. F. Barring gene expression after XIST: maintaining  
1037 facultative heterochromatin on the inactive X. *Semin Cell Dev Biol* **14**, 359-367,  
1038 doi:10.1016/j.semcdb.2003.09.016 (2003).
- 1039 34 Payer, B. & Lee, J. T. X chromosome dosage compensation: how mammals keep the  
1040 balance. *Annu Rev Genet* **42**, 733-772, doi:10.1146/annurev.genet.42.110807.091711  
1041 (2008).

- 1042 35 Wang, J. *et al.* Unusual maintenance of X chromosome inactivation predisposes female  
1043 lymphocytes for increased expression from the inactive X. *Proc Natl Acad Sci U S A* **113**,  
1044 E2029-2038, doi:10.1073/pnas.1520113113 (2016).
- 1045 36 Syrett, C. M. *et al.* Loss of Xist RNA from the inactive X during B cell development is  
1046 restored in a dynamic YY1-dependent two-step process in activated B cells. *PLoS Genet*  
1047 **13**, e1007050, doi:10.1371/journal.pgen.1007050 (2017).
- 1048 37 Syrett, C. M. *et al.* Diversity of Epigenetic Features of the Inactive X-Chromosome in NK  
1049 Cells, Dendritic Cells, and Macrophages. *Front Immunol* **9**, 3087,  
1050 doi:10.3389/fimmu.2018.03087 (2018).
- 1051 38 Pyfrom, S. *et al.* The dynamic epigenetic regulation of the inactive X chromosome in  
1052 healthy human B cells is dysregulated in lupus patients. *Proc Natl Acad Sci U S A* **118**,  
1053 doi:10.1073/pnas.2024624118 (2021).
- 1054 39 Wang, J. *et al.* Unusual maintenance of X chromosome inactivation predisposes female  
1055 lymphocytes for increased expression from the inactive X. *Proc Natl Acad Sci U S A*,  
1056 doi:10.1073/pnas.1520113113 (2016).
- 1057 40 Glynne, R., Ghandour, G., Rayner, J., Mack, D. H. & Goodnow, C. C. B-lymphocyte  
1058 quiescence, tolerance and activation as viewed by global gene expression profiling on  
1059 microarrays. *Immunol Rev* **176**, 216-246, doi:10.1034/j.1600-065x.2000.00614.x (2000).
- 1060 41 Kieffer-Kwon, K. R. *et al.* Myc Regulates Chromatin Decompaction and Nuclear  
1061 Architecture during B Cell Activation. *Mol Cell* **67**, 566-578 e510,  
1062 doi:10.1016/j.molcel.2017.07.013 (2017).
- 1063 42 Chan, W. F. *et al.* Pre-mitotic genome re-organisation bookends the B cell differentiation  
1064 process. *Nat Commun* **12**, 1344, doi:10.1038/s41467-021-21536-2 (2021).
- 1065 43 Simon, M. D. *et al.* High-resolution Xist binding maps reveal two-step spreading during  
1066 X-chromosome inactivation. *Nature* **504**, 465-469, doi:10.1038/nature12719 (2013).
- 1067 44 Teller, K. *et al.* A top-down analysis of Xa- and Xi-territories reveals differences of higher  
1068 order structure at  $\geq 20$  Mb genomic length scales. *Nucleus* **2**, 465-477,  
1069 doi:10.4161/nucl.2.5.17862 (2011).
- 1070 45 Nguyen, S. C. & Joyce, E. F. Programmable Chromosome Painting with Oligopaints.  
1071 *Methods Mol Biol* **2038**, 167-180, doi:10.1007/978-1-4939-9674-2\_11 (2019).
- 1072 46 Rosin, L. F., Nguyen, S. C. & Joyce, E. F. Condensin II drives large-scale folding and  
1073 spatial partitioning of interphase chromosomes in Drosophila nuclei. *PLOS Genetics* **14**,  
1074 e1007393, doi:10.1371/journal.pgen.1007393 (2018).
- 1075 47 Nir, G. *et al.* Walking along chromosomes with super-resolution imaging, contact maps,  
1076 and integrative modeling. *PLoS Genet* **14**, e1007872, doi:10.1371/journal.pgen.1007872  
1077 (2018).
- 1078 48 Gdula, M. R. *et al.* The non-canonical SMC protein SmcHD1 antagonises TAD formation  
1079 on the inactive X chromosome. *bioRxiv*, doi:10.1101/342147 (2018).
- 1080 49 Luppino, J. M. *et al.* Cohesin promotes stochastic domain intermingling to ensure proper  
1081 regulation of boundary-proximal genes. *Nature Genetics* **52**, 840-848,  
1082 doi:10.1038/s41588-020-0647-9 (2020).
- 1083 50 Csankovszki, G., Panning, B., Bates, B., Pehrson, J. R. & Jaenisch, R. Conditional deletion  
1084 of Xist disrupts histone macroH2A localization but not maintenance of X inactivation. *Nat*  
1085 *Genet* **22**, 323-324, doi:10.1038/11887 (1999).
- 1086 51 Hobeika, E. *et al.* Testing gene function early in the B cell lineage in mb1-cre mice. *Proc*  
1087 *Natl Acad Sci U S A* **103**, 13789-13794, doi:10.1073/pnas.0605944103 (2006).

- 1088 52 Souyris, M. *et al.* TLR7 escapes X chromosome inactivation in immune cells. *Sci Immunol*  
1089 **3**, doi:10.1126/sciimmunol.aap8855 (2018).
- 1090 53 Simon, M. D. *et al.* The genomic binding sites of a noncoding RNA. *Proc Natl Acad Sci U*  
1091 *S A* **108**, 20497-20502, doi:10.1073/pnas.1113536108 (2011).
- 1092 54 Bauer, M. *et al.* Chromosome compartments on the inactive X guide TAD formation  
1093 independently of transcription during X-reactivation. *Nature Communications* **12**,  
1094 doi:10.1038/s41467-021-23610-1 (2021).
- 1095 55 Rowley, M. J. & Corces, V. G. Organizational principles of 3D genome architecture. *Nat*  
1096 *Rev Genet* **19**, 789-800, doi:10.1038/s41576-018-0060-8 (2018).
- 1097 56 Lucic, B. *et al.* Spatially clustered loci with multiple enhancers are frequent targets of HIV-  
1098 1 integration. *Nat Commun* **10**, 4059, doi:10.1038/s41467-019-12046-3 (2019).
- 1099 57 Collombet, S. *et al.* Parental-to-embryo switch of chromosome organization in early  
1100 embryogenesis. *Nature* **580**, 142-146, doi:10.1038/s41586-020-2125-z (2020).
- 1101 58 Syrett, C. M. *et al.* Altered X-chromosome inactivation in T cells may promote sex-biased  
1102 autoimmune diseases. *JCI Insight* **4**, doi:10.1172/jci.insight.126751 (2019).
- 1103 59 Minajigi, A. *et al.* A comprehensive Xist interactome reveals cohesin repulsion and an  
1104 RNA-directed chromosome conformation. *Science* **349**, doi:10.1126/science.aab2276  
1105 aab2276  
1106 10.1126/science.aab2276 (2015).
- 1107 60 Kriz, A. J., Colognori, D., Sunwoo, H., Nabet, B. & Lee, J. T. Balancing cohesin eviction  
1108 and retention prevents aberrant chromosomal interactions, Polycomb-mediated repression,  
1109 and X-inactivation. *Mol Cell* **81**, 1970-1987 e1979, doi:10.1016/j.molcel.2021.02.031  
1110 (2021).
- 1111 61 Anand, L. & Rodriguez Lopez, C. M. chromoMap: An R package for Interactive  
1112 Visualization and Annotation of Chromosomes. *bioRxiv*, doi:10.1101/605600 (2020).
- 1113 62 Györgyi Csankovszki, B. P., Brian Bates, & Jaenisch, J. R. P. R. Conditional deletion of  
1114 Xist disrupts histone macroH2A localization but not maintenance of X inactivation. *Nature*  
1115 *Genetics* **22** (1999).
- 1116 63 Khan, M. & Gasser, S. Generating Primary Fibroblast Cultures from Mouse Ear and Tail  
1117 Tissues. *J Vis Exp*, doi:10.3791/53565 (2016).
- 1118 64 Keane, T. M. *et al.* Mouse genomic variation and its effect on phenotypes and gene  
1119 regulation. *Nature* **477**, 289-294, doi:10.1038/nature10413 (2011).
- 1120 65 Berletch, J. B. *et al.* Identification of genes escaping X inactivation by allelic expression  
1121 analysis in a novel hybrid mouse model. *Data Brief* **5**, 761-769,  
1122 doi:10.1016/j.dib.2015.10.033 (2015).
- 1123 66 Berletch, J. B. *et al.* Escape from X Inactivation Varies in Mouse Tissues. *PLOS Genetics*  
1124 **11**, e1005079, doi:10.1371/journal.pgen.1005079 (2015).
- 1125 67 Zhou, Y. *et al.* Metascape provides a biologist-oriented resource for the analysis of  
1126 systems-level datasets. *Nature Communications* **10**, doi:10.1038/s41467-019-09234-6  
1127 (2019).
- 1128 68 Langmead, B. & Salzberg, S. L. Fast gapped-read alignment with Bowtie 2. *Nature*  
1129 *Methods* **9**, 357-359, doi:10.1038/nmeth.1923 (2012).
- 1130 69 Danecek, P. *et al.* Twelve years of SAMtools and BCFtools. *GigaScience* **10**,  
1131 doi:10.1093/gigascience/giab008 (2021).



- 1132 70 Tarasov, A., Vilella, A. J., Cuppen, E., Nijman, I. J. & Prins, P. Sambamba: fast processing  
1133 of NGS alignment formats. *Bioinformatics* **31**, 2032-2034,  
1134 doi:10.1093/bioinformatics/btv098 (2015).
- 1135 71 Amemiya, H. M., Kundaje, A. & Boyle, A. P. The ENCODE Blacklist: Identification of  
1136 Problematic Regions of the Genome. *Scientific Reports* **9**, doi:10.1038/s41598-019-45839-  
1137 z (2019).
- 1138 72 Quinlan, A. R. & Hall, I. M. BEDTools: a flexible suite of utilities for comparing genomic  
1139 features. *Bioinformatics* **26**, 841-842, doi:10.1093/bioinformatics/btq033 (2010).
- 1140 73 Kharchenko, P. V., Tolstorukov, M. Y. & Park, P. J. Design and analysis of ChIP-seq  
1141 experiments for DNA-binding proteins. *Nature Biotechnology* **26**, 1351-1359,  
1142 doi:10.1038/nbt.1508 (2008).
- 1143 74 Thorvaldsdottir, H., Robinson, J. T. & Mesirov, J. P. Integrative Genomics Viewer (IGV):  
1144 high-performance genomics data visualization and exploration. *Briefings in Bioinformatics*  
1145 **14**, 178-192, doi:10.1093/bib/bbs017 (2013).
- 1146 75 Ramírez, F. *et al.* deepTools2: a next generation web server for deep-sequencing data  
1147 analysis. *Nucleic Acids Research* **44**, W160-W165, doi:10.1093/nar/gkw257 (2016).
- 1148 76 Zhang, Y. *et al.* Model-based Analysis of ChIP-Seq (MACS). *Genome Biology* **9**, R137,  
1149 doi:10.1186/gb-2008-9-9-r137 (2008).
- 1150 77 Yu, G., Wang, L.-G. & He, Q.-Y. ChIPseeker: an R/Bioconductor package for ChIP peak  
1151 annotation, comparison and visualization. *Bioinformatics* **31**, 2382-2383,  
1152 doi:10.1093/bioinformatics/btv145 (2015).
- 1153 78 Karolchik, D. The UCSC Table Browser data retrieval tool. *Nucleic Acids Research* **32**,  
1154 493D-496, doi:10.1093/nar/gkh103 (2004).
- 1155 79 Knight, P. A. & Ruiz, D. A fast algorithm for matrix balancing. *IMA Journal of Numerical*  
1156 *Analysis* **33**, 1029-1047, doi:10.1093/imanum/drs019 (2013).
- 1157 80 Emerson, D. *et al.* *Cohesin-mediated loop anchors confine the location of human*  
1158 *replication origins* (Cold Spring Harbor Laboratory, 2021).
- 1159 81 Fernandez, L. R., Gilgenast, T. G. & Phillips-Cremins, J. E. 3DeFDR: statistical methods  
1160 for identifying cell type-specific looping interactions in 5C and Hi-C data. *Genome Biology*  
1161 **21**, doi:10.1186/s13059-020-02061-9 (2020).
- 1162 82 Zhang, H. *et al.* Chromatin structure dynamics during the mitosis-to-G1 phase transition.  
1163 *Nature* **576**, 158-162, doi:10.1038/s41586-019-1778-y (2019).
- 1164 83 Norton, H. K. *et al.* Detecting hierarchical genome folding with network modularity.  
1165 *Nature Methods* **15**, 119-122, doi:10.1038/nmeth.4560 (2018).
- 1166 84 Emerson, D. J. *et al.* Cohesin-mediated loop anchors confine the locations of human  
1167 replication origins. *Nature* **606**, 812-819, doi:10.1038/s41586-022-04803-0 (2022).
- 1168 85 Beagan, J. A. & Phillips-Cremins, J. E. On the existence and functionality of topologically  
1169 associating domains. *Nature Genetics* **52**, 8-16, doi:10.1038/s41588-019-0561-1 (2020).
- 1170 86 Phillips-Cremins, J. E. Unraveling architecture of the pluripotent genome. *Curr Opin Cell*  
1171 *Biol* **28**, 96-104, doi:10.1016/j.jceb.2014.04.006 (2014).
- 1172 87 Norton, H. K. & Phillips-Cremins, J. E. Crossed wires: 3D genome misfolding in human  
1173 disease. *J Cell Biol* **216**, 3441-3452, doi:10.1083/jcb.201611001 (2017).
- 1174 88 Crane, E. *et al.* Condensin-driven remodelling of X chromosome topology during dosage  
1175 compensation. *Nature* **523**, 240-244, doi:10.1038/nature14450 (2015).

- 1176 89 Beliveau, B. J. *et al.* OligoMiner provides a rapid, flexible environment for the design of  
1177 genome-scale oligonucleotide in situ hybridization probes. *Proceedings of the National*  
1178 *Academy of Sciences* **115**, E2183-E2192, doi:10.1073/pnas.1714530115 (2018).
- 1179 90 Beliveau, B. J. *et al.* Single-molecule super-resolution imaging of chromosomes and in situ  
1180 haplotype visualization using Oligopaint FISH probes. *Nat Commun* **6**, 7147,  
1181 doi:10.1038/ncomms8147 (2015).
- 1182 91 Ollion, J., Cochenec, J., Loll, F., Escude, C. & Boudier, T. TANGO: a generic tool for  
1183 high-throughput 3D image analysis for studying nuclear organization. *Bioinformatics* **29**,  
1184 1840-1841, doi:10.1093/bioinformatics/btt276 (2013).
- 1185

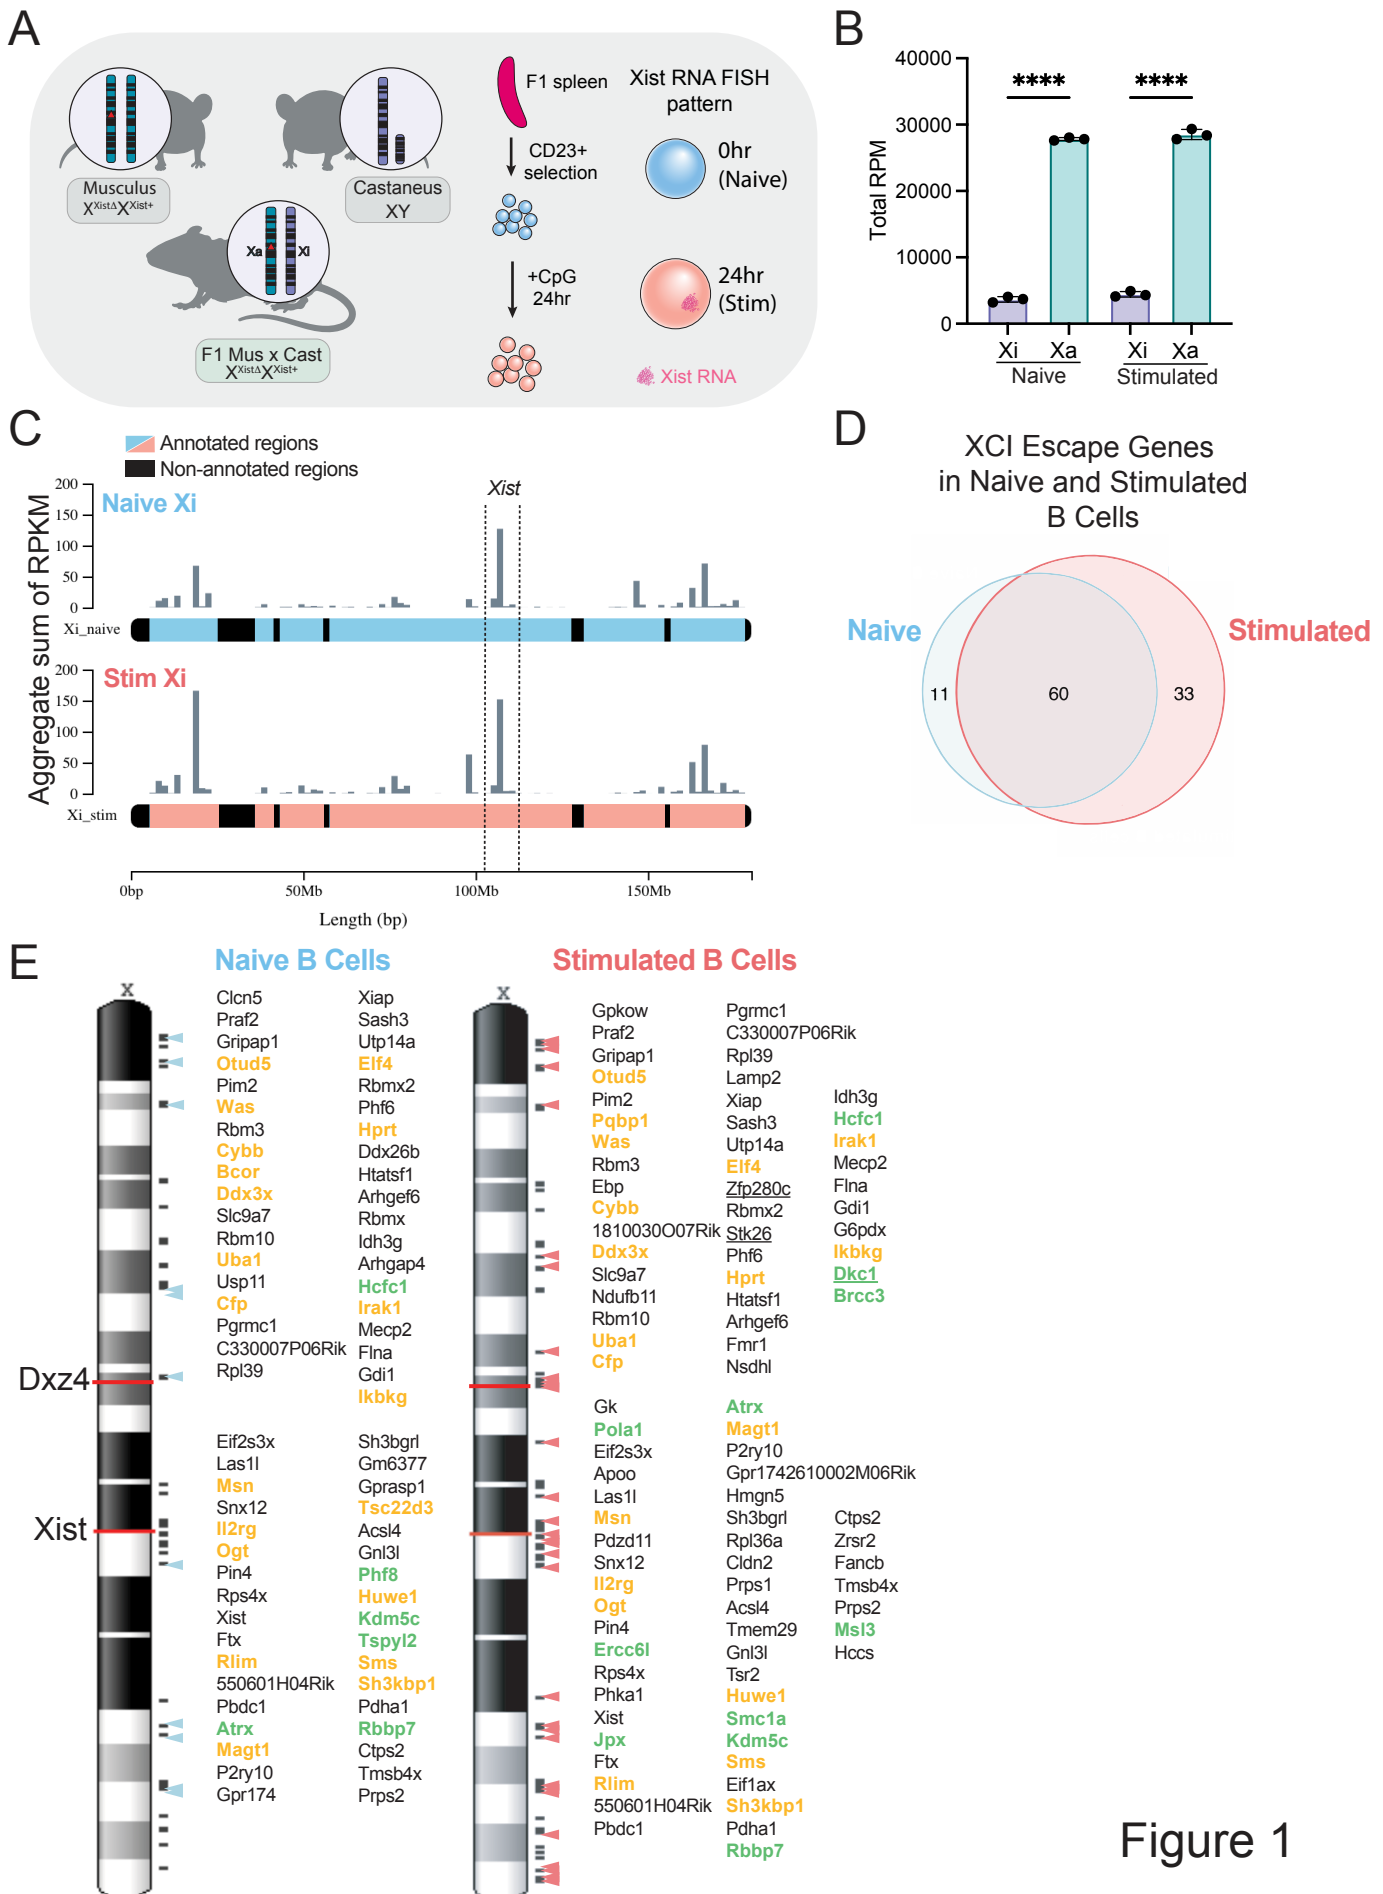

Figure 1



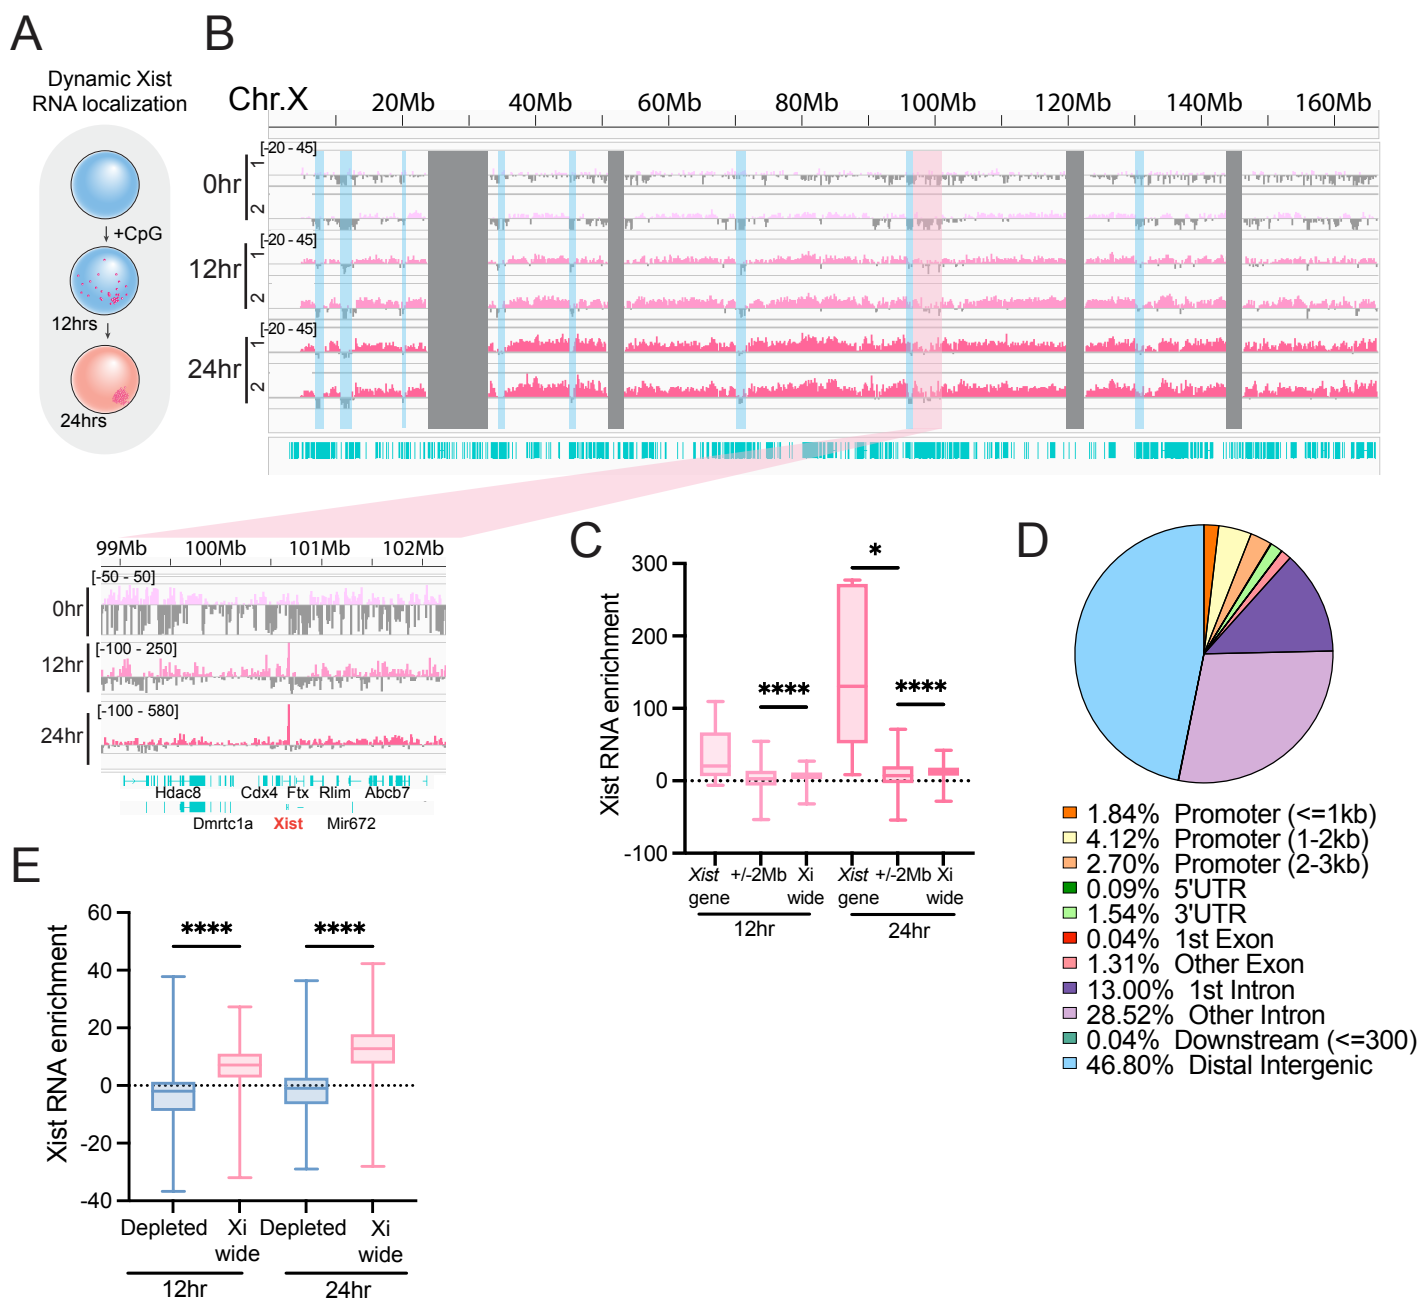

Figure 2

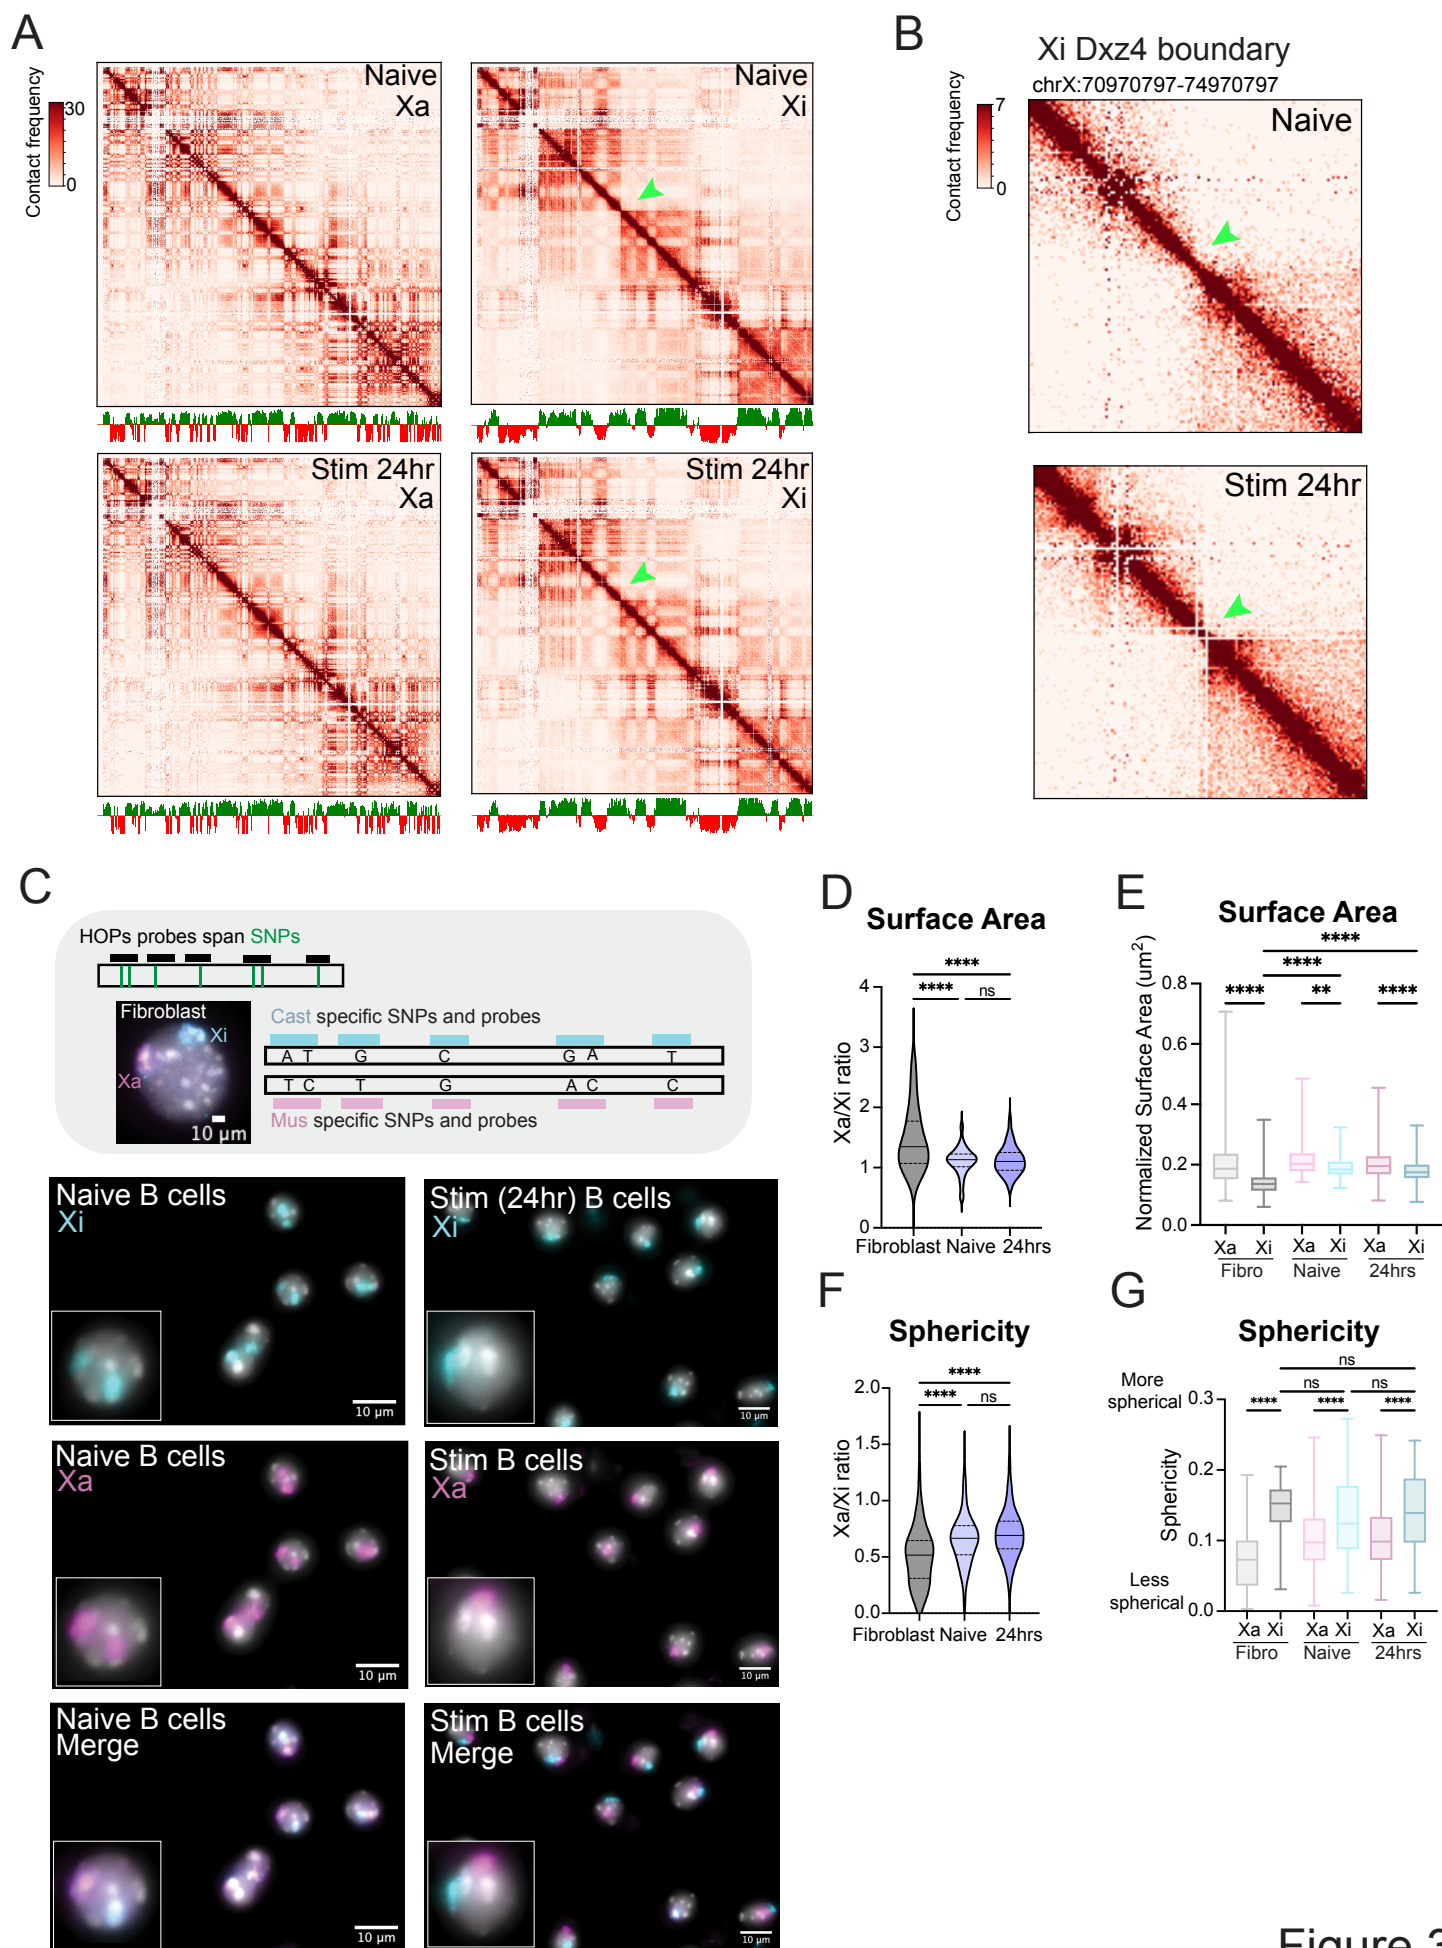

Figure 3

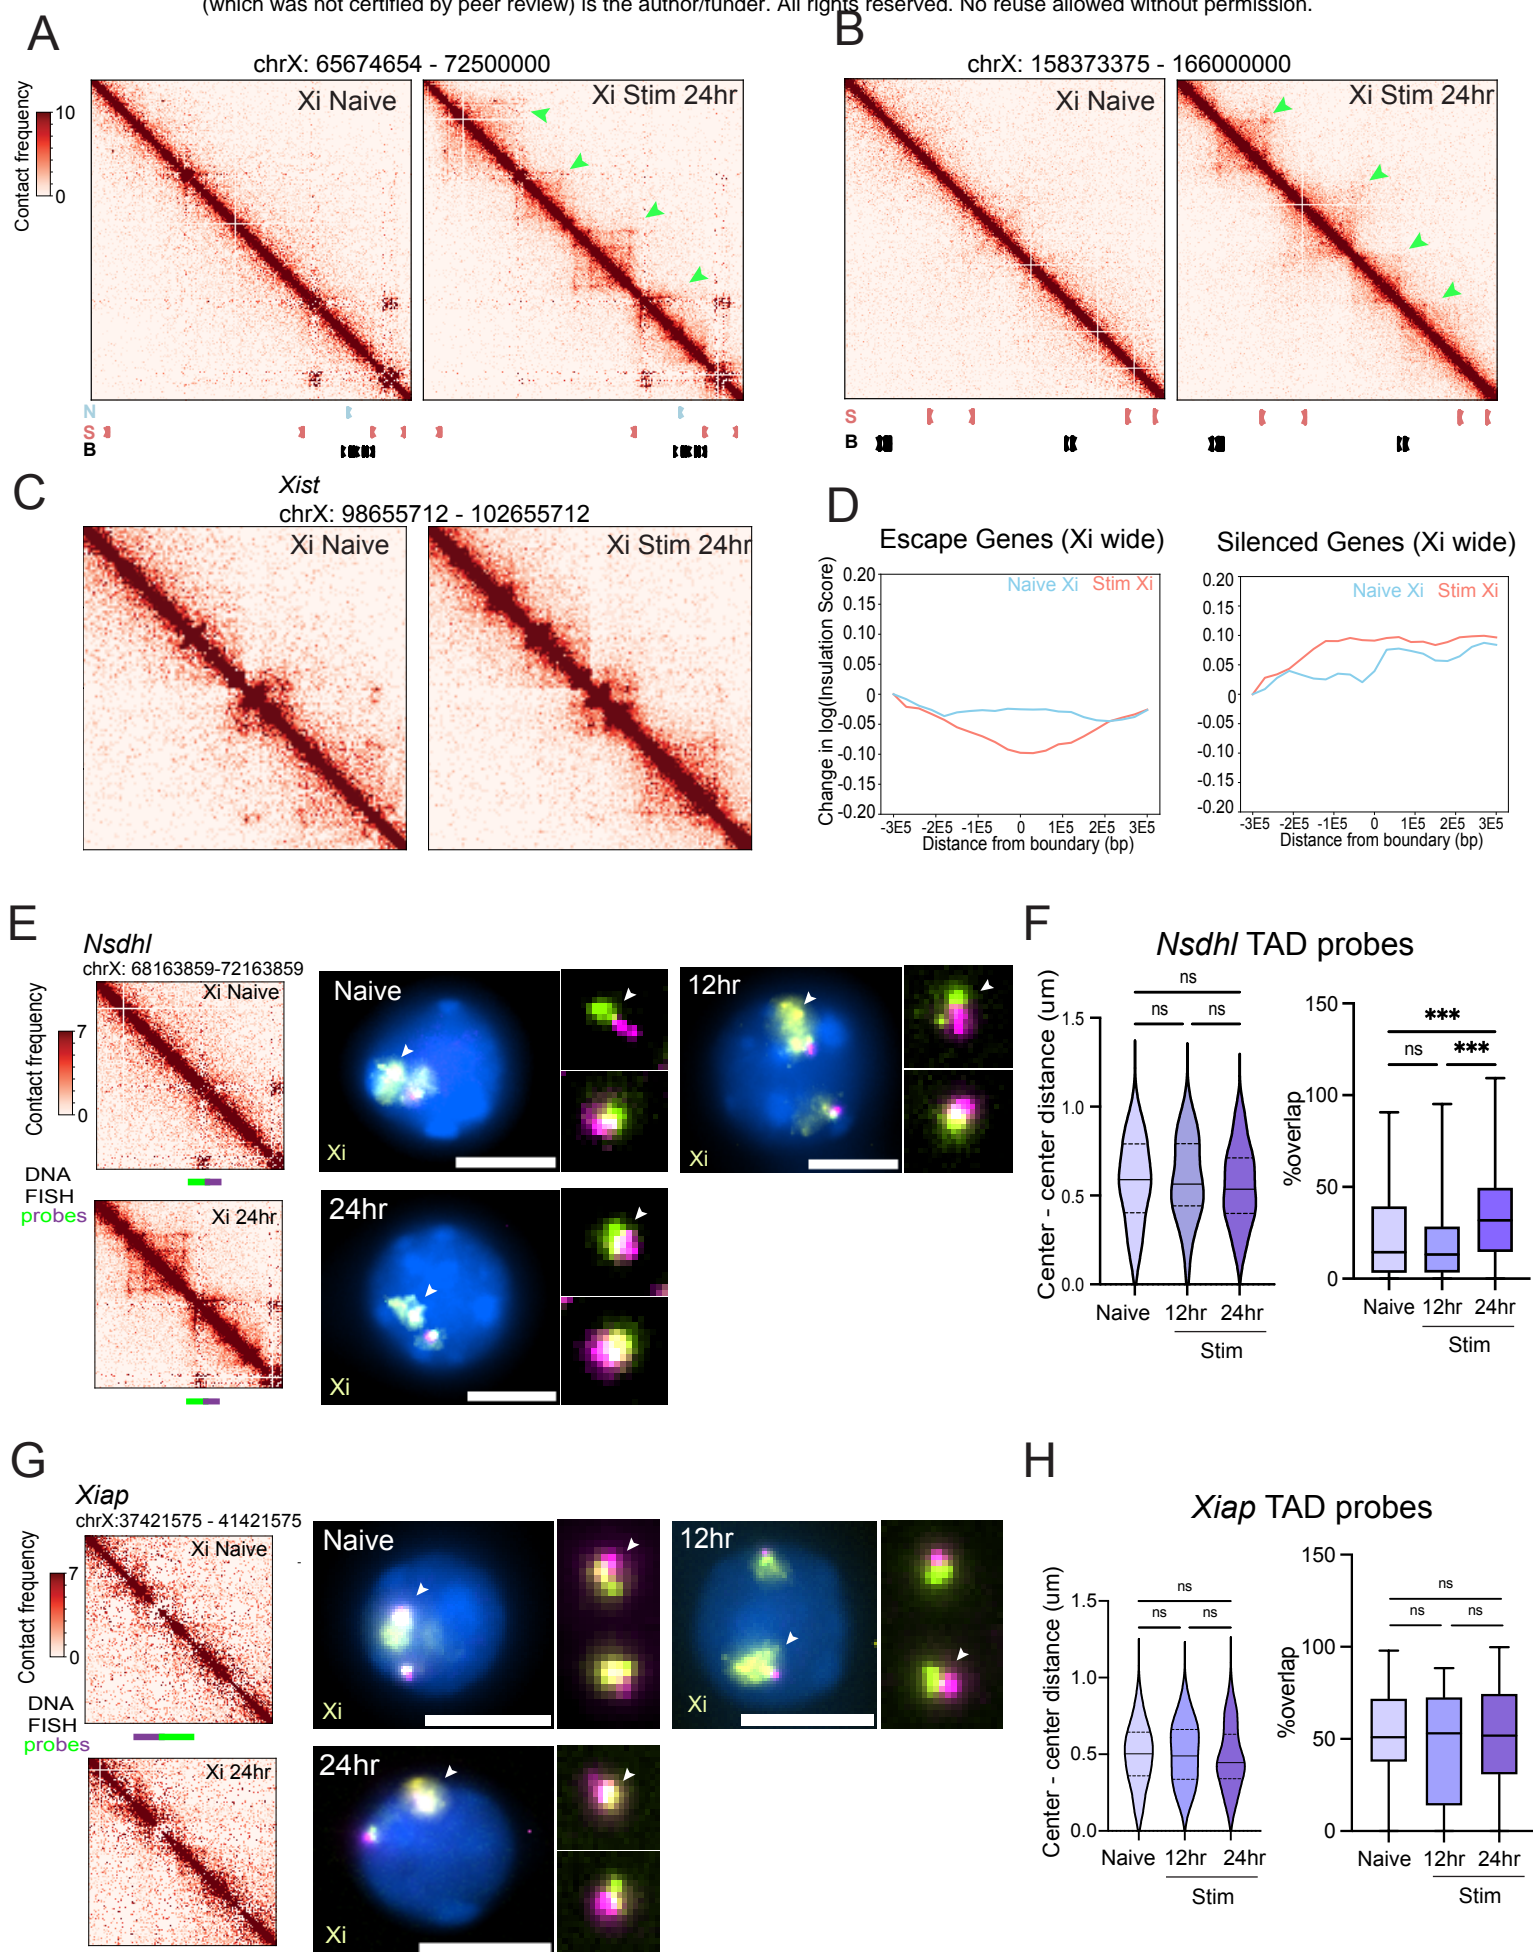

Figure 4



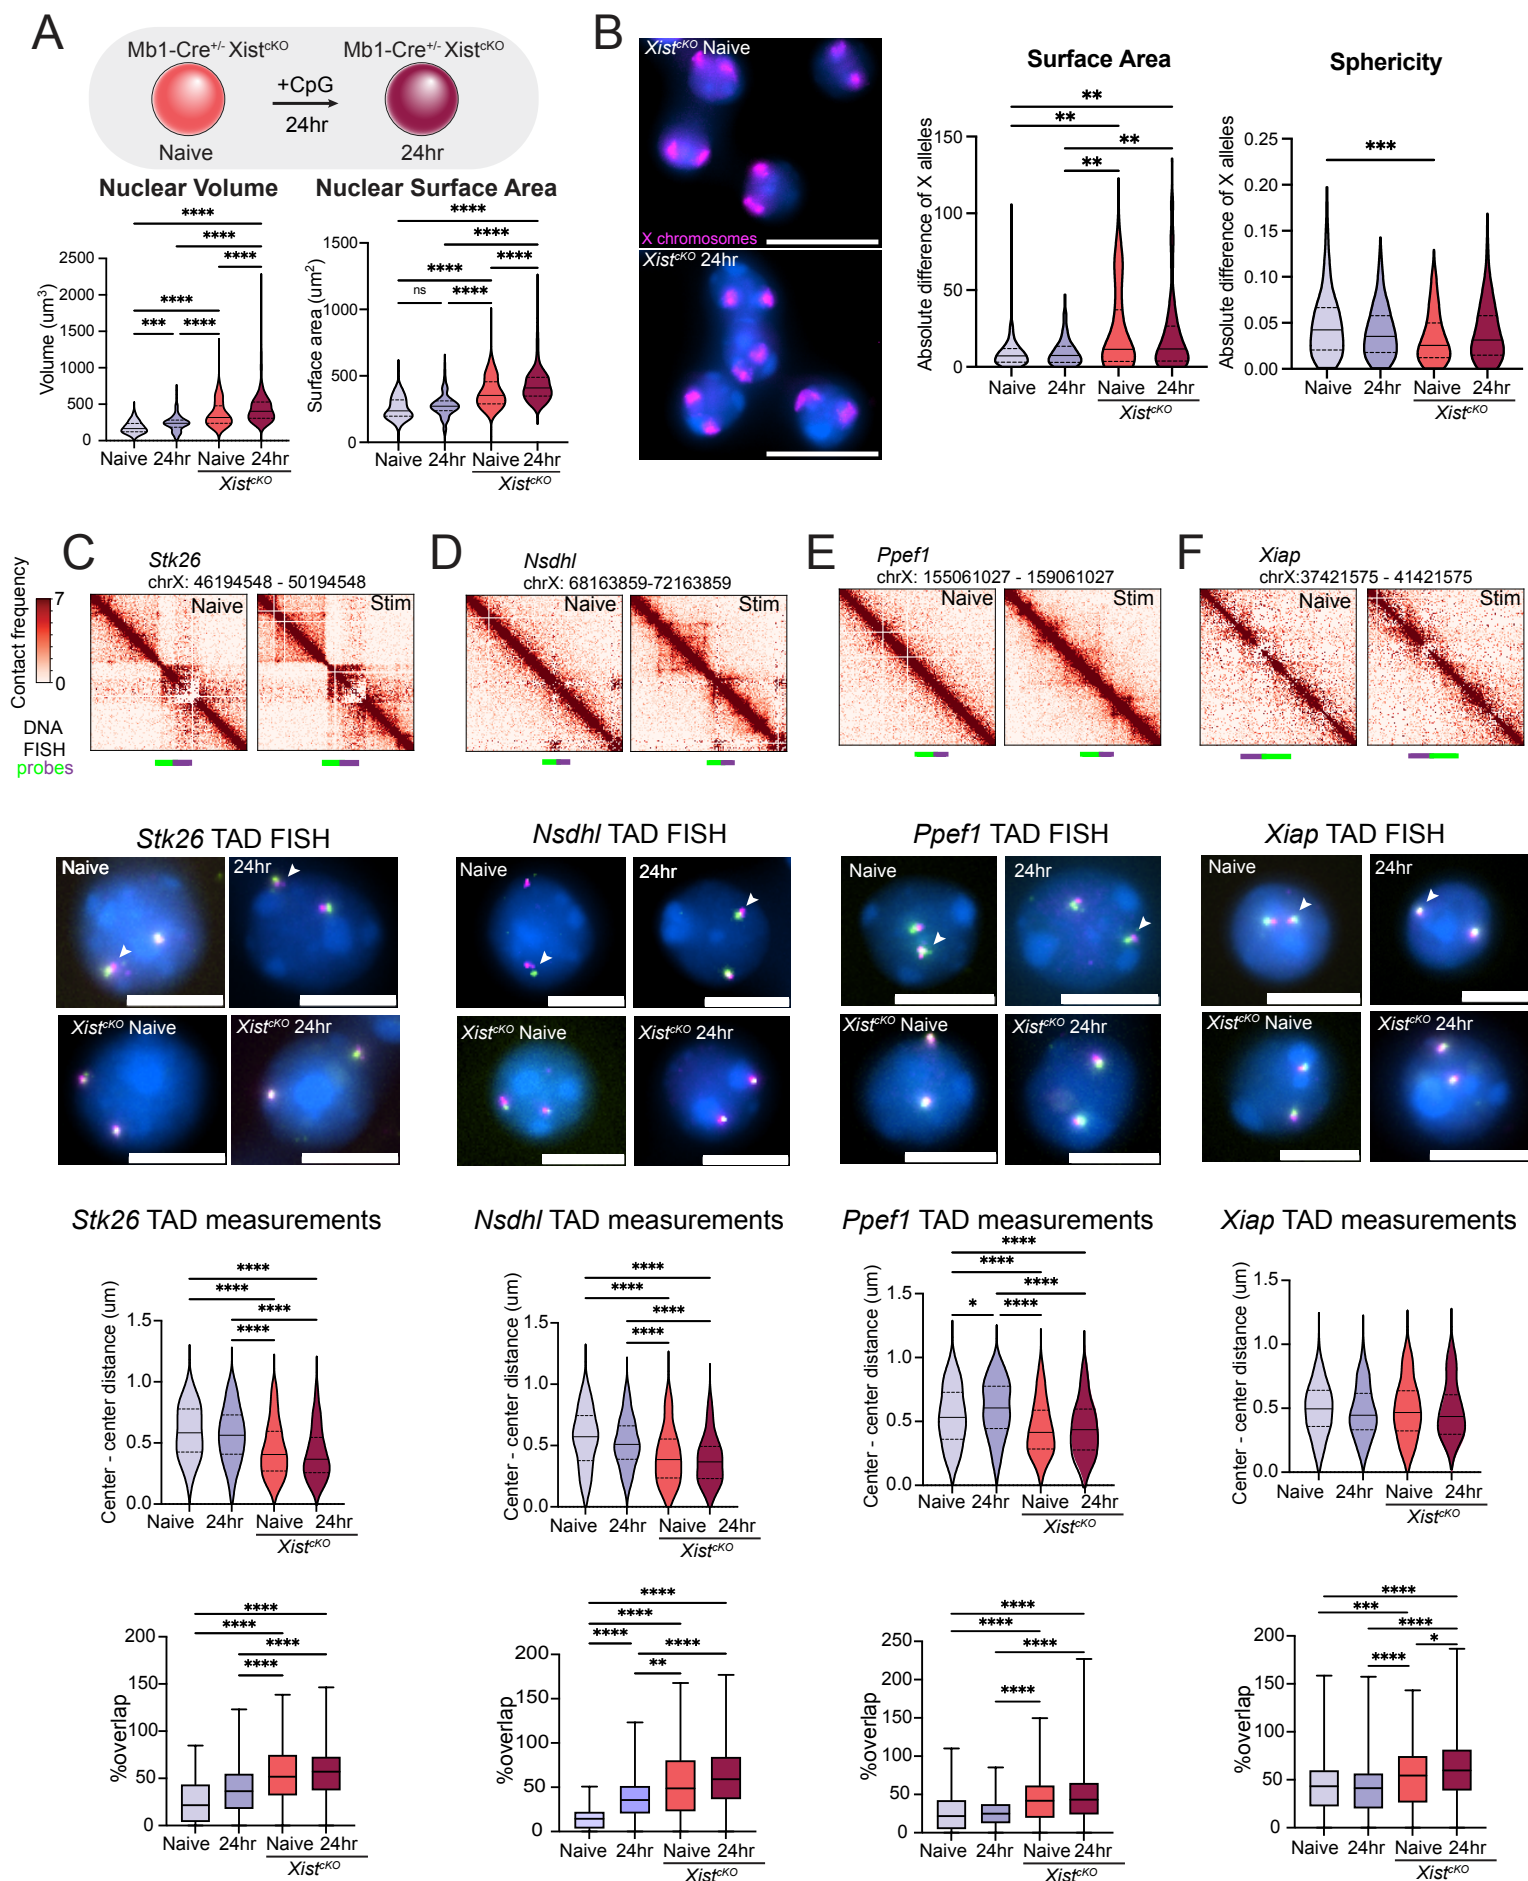

Figure 5

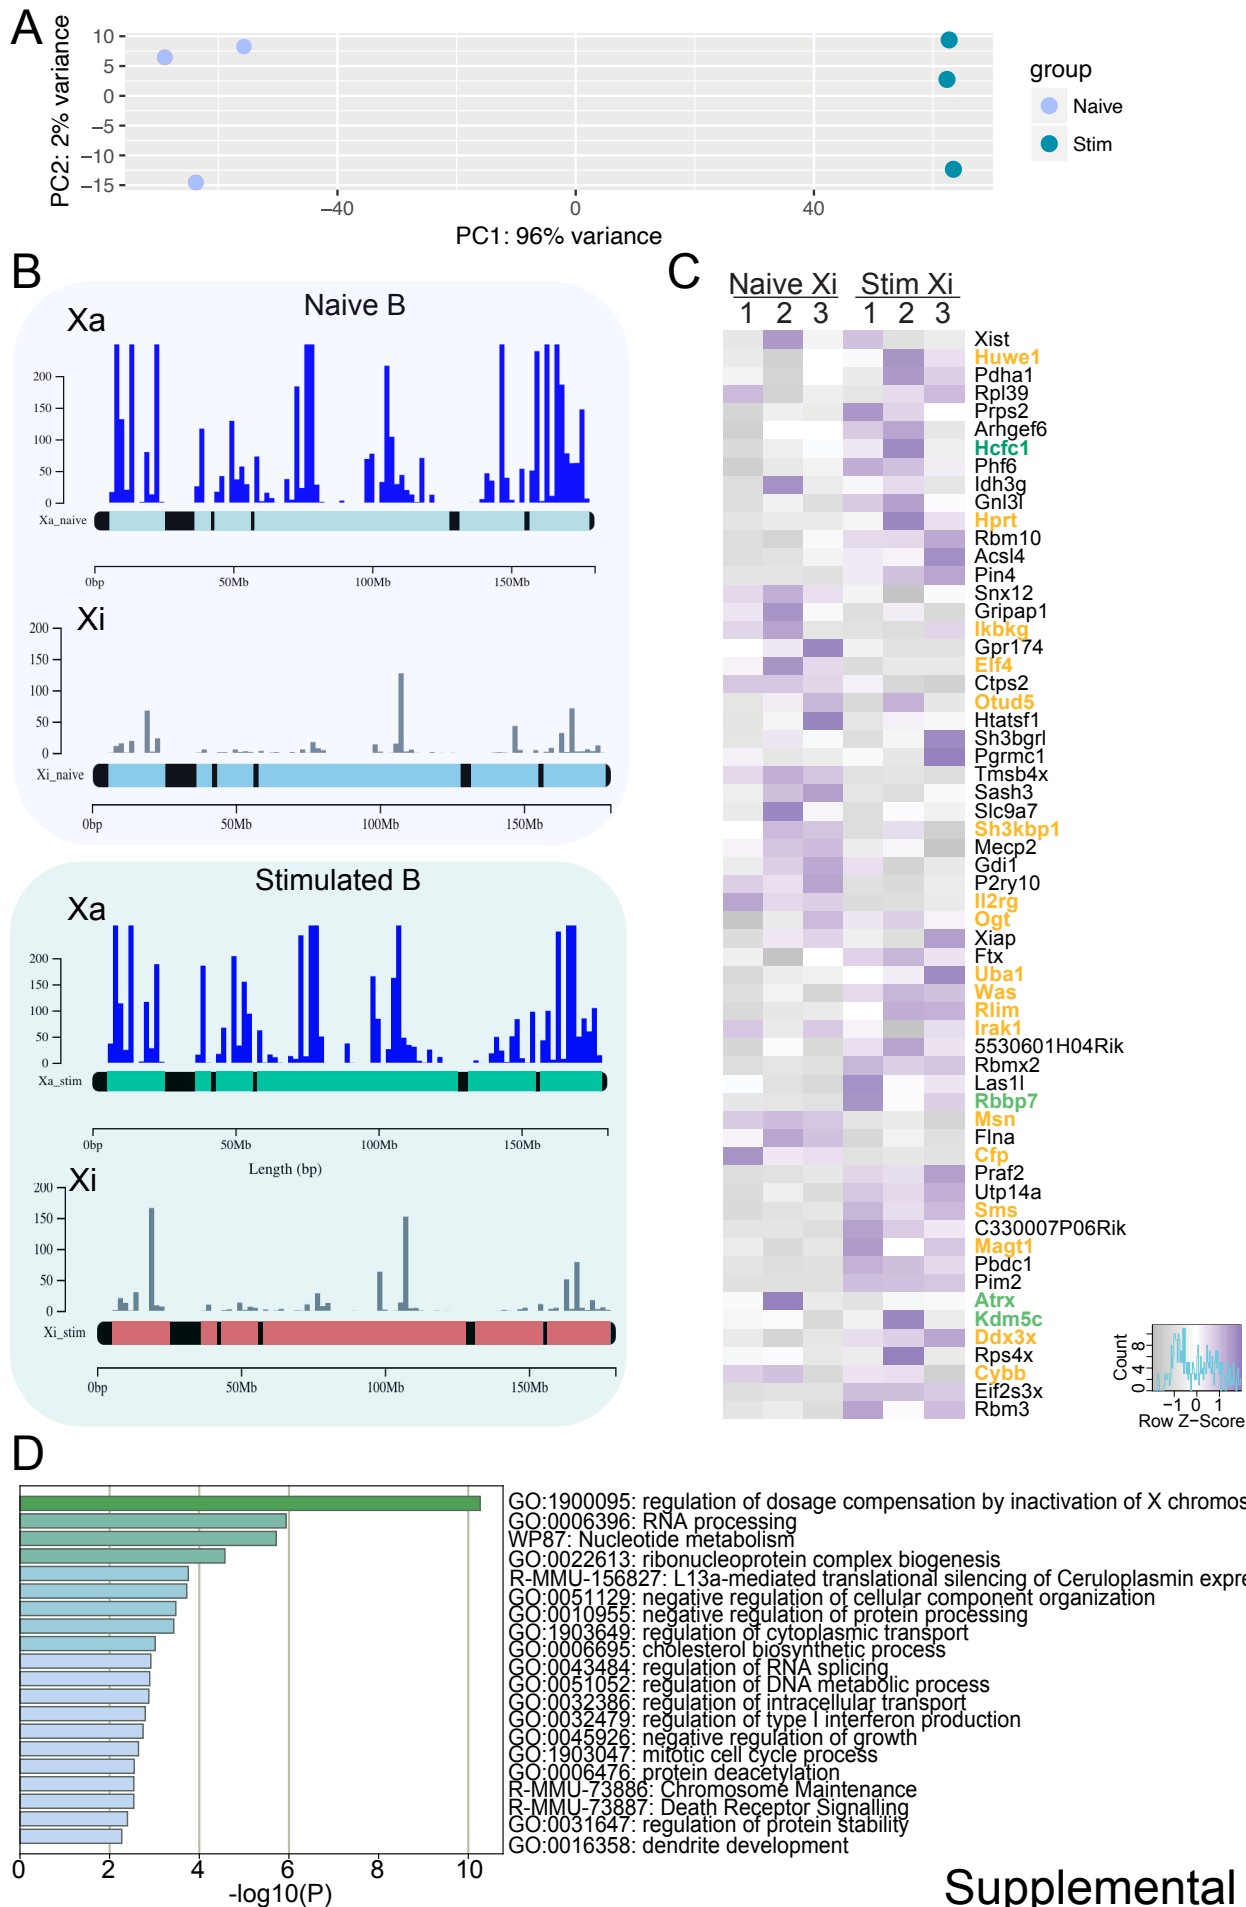

## Chromosome 4

## Chromosome 13

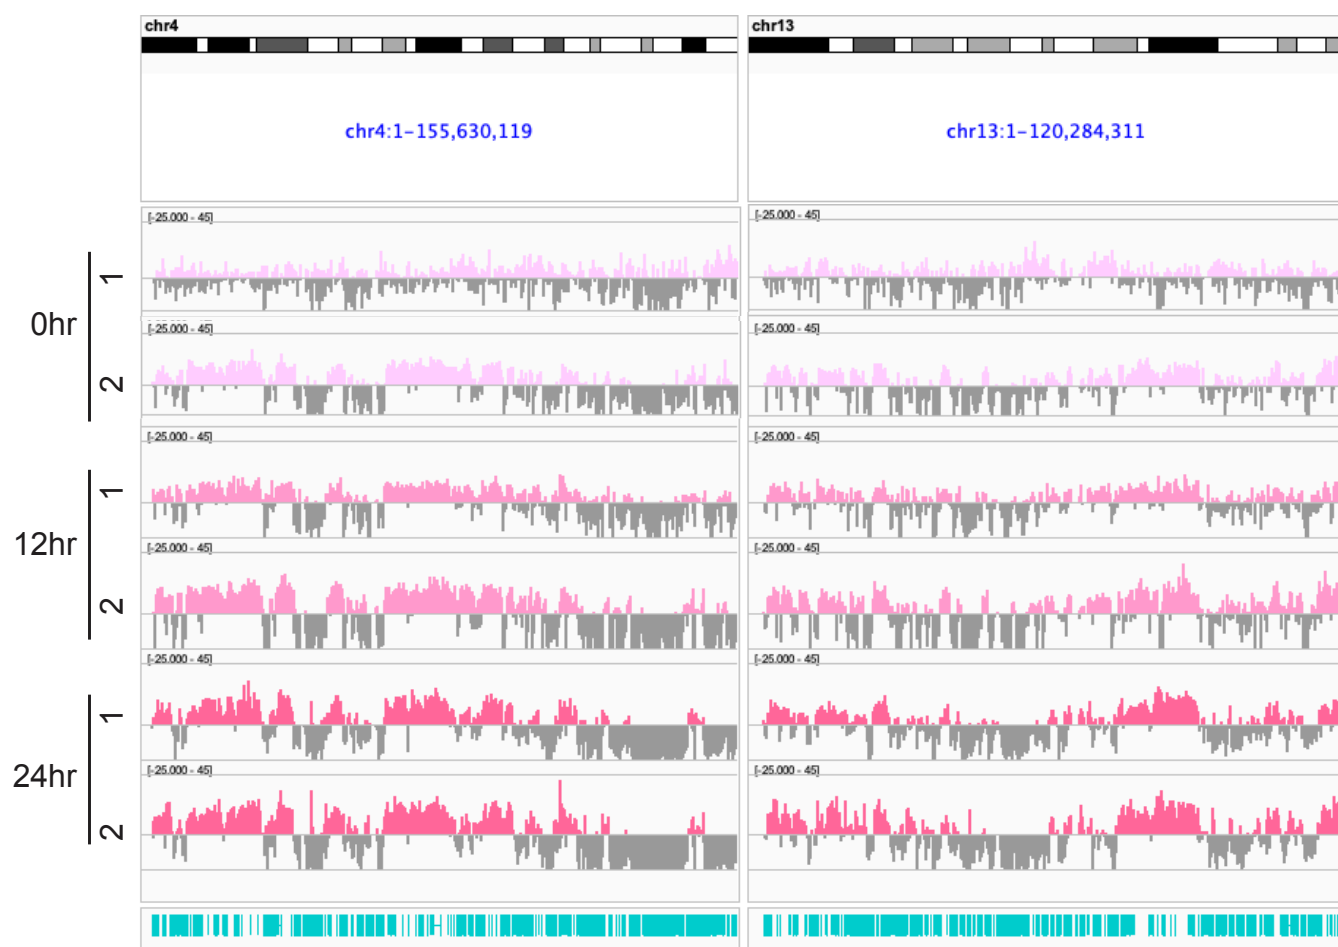

Supplemental Figure 2

A

Chromosome 13

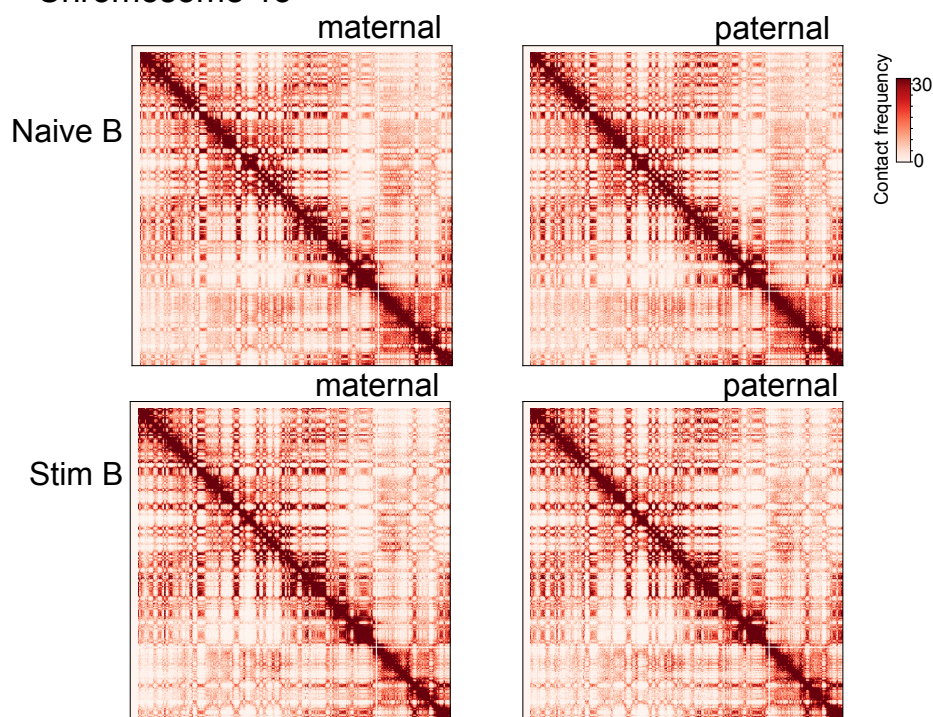

B

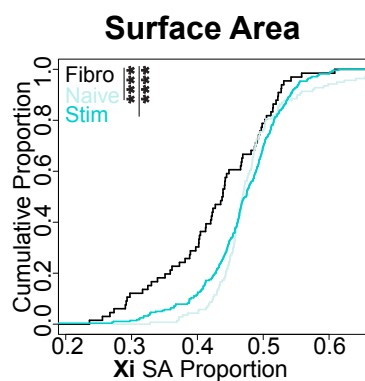

C

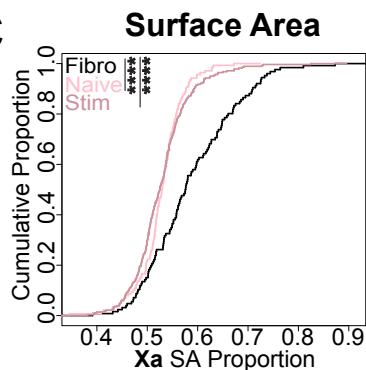

D

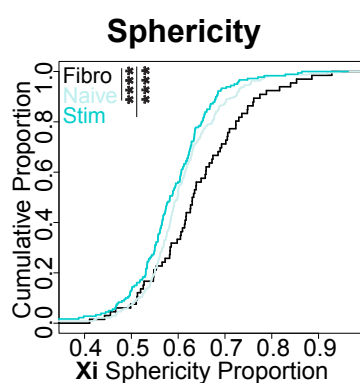

E

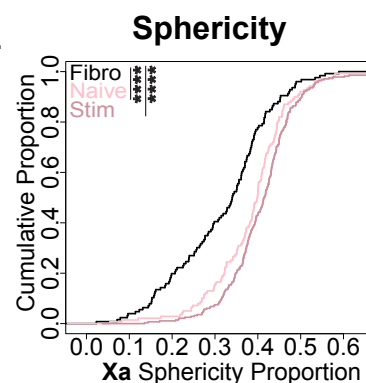



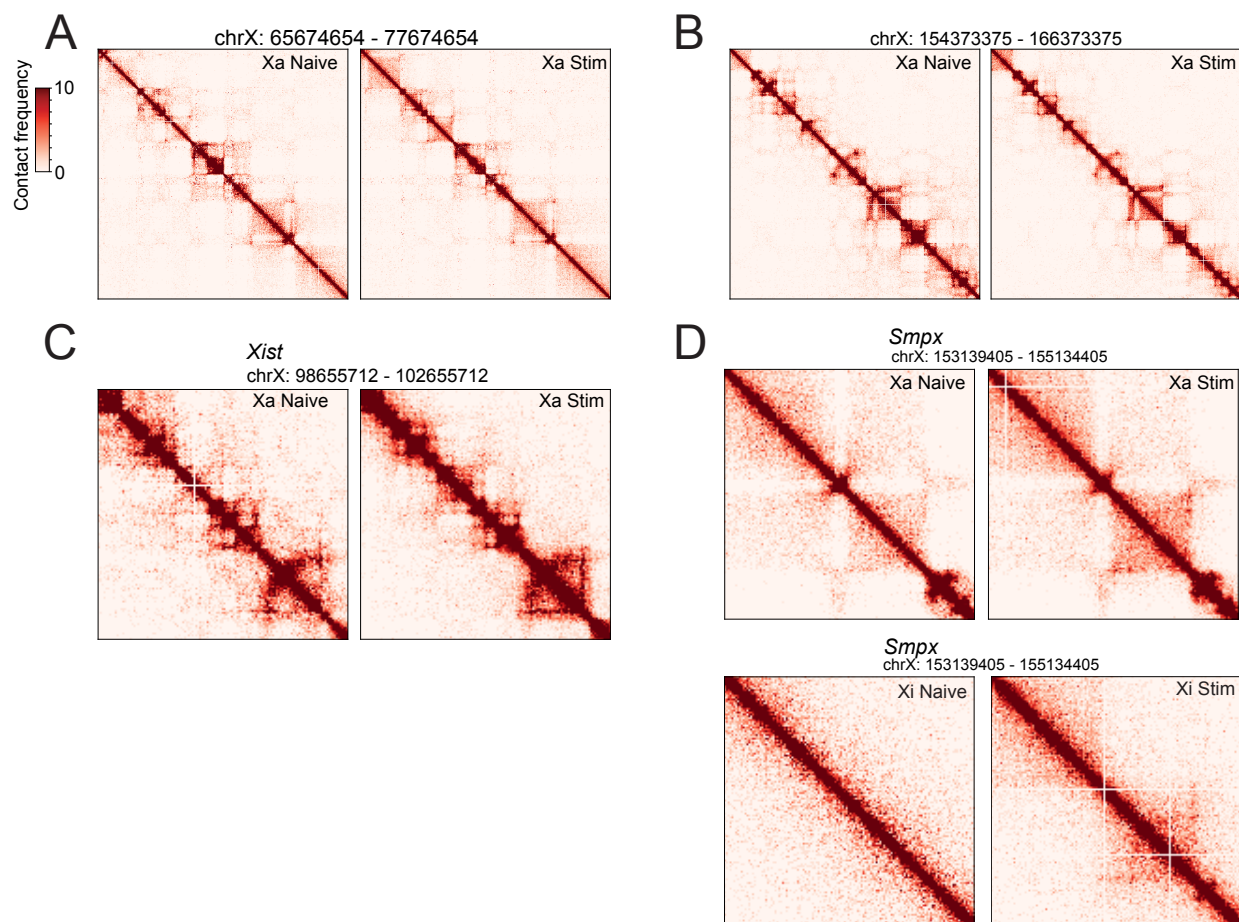

Supplemental Figure 4
